# Supplementary material for: Salinity Tolerance in a Synthetic Allotetraploid Wheat (SlSlAA) Is Similar to Its Higher Tolerant Parent Aegilops longissima (SlSl) and Linked to Flavonoids Metabolism
Source: Front Plant Sci. 2022 Mar 17;13:835498. doi: 10.3389/fpls.2022.835498 (PMC8968947; doi:10.3389/fpls.2022.835498)
Supplement: Supplementary Table 1 — Information of all detected metabolites. [file Table_1.XLSX]

## Sheet: Sheet1
Compounds	Class I	Class II	CAS
10-Formyltetrahydrofuran	Alkaloids	Alkaloids	2800-34-2
2,4-Dihydroxy-1,4-benzoxazin-3-one(DIBOA)	Alkaloids	Alkaloids	17359-54-5
2-Phenylacetamide	Alkaloids	Alkaloids	103-81-1
3-Indoleacrylic acid	Alkaloids	Alkaloids	1204-06-4
4-Hydroxymandelonitrile	Alkaloids	Alkaloids	13093-65-7
6-Deoxyfagomine	Alkaloids	Alkaloids	197449-09-5
Acetylcholine	Alkaloids	Alkaloids	60-31-1
Betaine	Alkaloids	Alkaloids	107-43-7
Caffeoylcholine-4-O-glucoside	Alkaloids	Alkaloids	-
Choline	Alkaloids	Alkaloids	62-49-7
Cis-N-Feruloyltyramine	Alkaloids	Alkaloids	80510-09-4
Cis-Zeatin-7-N-glucoside	Alkaloids	Alkaloids	38165-56-9
Coixol; 6-Methoxy-2-benzoxazolinone; MBOA	Alkaloids	Alkaloids	532-91-2
DIBOA beta-D-glucoside	Alkaloids	Alkaloids	-
DIMBOA glucoside	Alkaloids	Alkaloids	18607-79-9
DL-2-Aminoadipic acid	Alkaloids	Alkaloids	542-32-5
Ergotamine	Alkaloids	Alkaloids	113-15-5
HBOA	Alkaloids	Alkaloids	23520-34-5
HBOA-2-O-glucoside	Alkaloids	Alkaloids	27625-86-1
Histidinol	Alkaloids	Alkaloids	501-28-0
N-Acetyl-5-hydroxytryptamine	Alkaloids	Alkaloids	1210-83-9
N-benzylformamide	Alkaloids	Alkaloids	6343-54-0
N-Benzylmethylene isomethylamine	Alkaloids	Alkaloids	-
Nicotinic Acid Methyl Ester(Methyl Nicotinate)	Alkaloids	Alkaloids	93-60-7
N-Methyltryptamine	Alkaloids	Alkaloids	61-49-4
N-Oleoylethanolamine	Alkaloids	Alkaloids	111-58-0
O-Phosphocholine	Alkaloids	Alkaloids	107-73-3
Phenethylamine	Alkaloids	Alkaloids	64-04-0
Piperidine	Alkaloids	Alkaloids	110-89-4
Trans-Zeatin-1-O-Glucoside	Alkaloids	Alkaloids	56329-06-7
Trigonelline	Alkaloids	Alkaloids	535-83-1
α-Ergocryptine	Alkaloids	Alkaloids	511-09-1
Acetryptine	Alkaloids	Phenolamine	3551-18-6
Cadaverine	Alkaloids	Phenolamine	462-94-2
Diferuloylcadaverine	Alkaloids	Phenolamine	-
N-(4'-O-glycosyl)-feruloyl agmatine	Alkaloids	Phenolamine	-
N-(4'-O-glycosyl)-p-coumaroyl agmatine	Alkaloids	Phenolamine	-
N',N'',N'''-p-Coumaroyl-cinnamoyl-caffeoyl spermidine	Alkaloids	Phenolamine	-
N,N'-Diferuloylputrescine	Alkaloids	Phenolamine	42369-86-8
N1,N8-Bis(sinapoyl)spermidine	Alkaloids	Phenolamine	-
N-Acetylputrescine	Alkaloids	Phenolamine	18233-70-0
N-Caffeoylputrescine	Alkaloids	Phenolamine	29554-26-5
N-Feruloylagmatine	Alkaloids	Phenolamine	-
N-Feruloyl-Cadaverine	Alkaloids	Phenolamine	-
N-Feruloylhydroxyputrescine	Alkaloids	Phenolamine	-
N-Feruloylputrescine	Alkaloids	Phenolamine	501-13-3
N-Feruloylserotonin	Alkaloids	Phenolamine	68573-23-9
N-Feruloyltryptamine	Alkaloids	Phenolamine	53905-13-8
N-Feruloyltyramine	Alkaloids	Phenolamine	66648-43-9
N-Glucosyl-p-coumaroylputrescine	Alkaloids	Phenolamine	-
N-p-Coumaroylhydroxyputrescine	Alkaloids	Phenolamine	-
N-p-Coumaroyl-N'-feruloylputrescine	Alkaloids	Phenolamine	380302-96-5
p-Coumaroylagmatine	Alkaloids	Phenolamine	7295-86-5
p-Coumaroylcadaverine	Alkaloids	Phenolamine	-
p-Coumaroylferuloylcadaverine	Alkaloids	Phenolamine	-
p-Coumaroylputrescine	Alkaloids	Phenolamine	34136-53-3
Putrescine	Alkaloids	Phenolamine	110-60-1
Sinapoylagmatine	Alkaloids	Phenolamine	-
Sinapoylputrescine	Alkaloids	Phenolamine	70185-57-8
Spermidine	Alkaloids	Phenolamine	124-20-9
Spermine	Alkaloids	Phenolamine	71-44-3
3-(2-(Methylamino)ethyl)-1H-indol-5-ol	Alkaloids	Plumerane	1134-01-6
3-Indolepropionic acid	Alkaloids	Plumerane	830-96-6
Indole	Alkaloids	Plumerane	120-72-9
Indole 3-acetic acid (IAA)	Alkaloids	Plumerane	87-51-4
Indole-3-carboxaldehyde	Alkaloids	Plumerane	487-89-8
Indole-3-carboxylic acid	Alkaloids	Plumerane	771-50-6
Indole-5-carboxylic acid	Alkaloids	Plumerane	1670-81-1
Methoxyindoleacetic acid	Alkaloids	Plumerane	3471-31-6
Serotonin	Alkaloids	Plumerane	50-67-9
Tryptamine	Alkaloids	Plumerane	61-54-1
2,4-Dihydroxyquinoline	Alkaloids	Quinoline alkaloids	86-95-3
1-Methylpiperidine-2-carboxylic acid	Amino acids and derivatives	Amino acids and derivatives	7730-87-2
2,3-Dimethylsuccinic acid	Amino acids and derivatives	Amino acids and derivatives	13545-04-5
2,6-Diaminooimelic acid	Amino acids and derivatives	Amino acids and derivatives	583-93-7
2-Aminoisobutyric acid	Amino acids and derivatives	Amino acids and derivatives	62-57-7
3,4-Dihydroxy-L-phenylalanine (L-Dopa)	Amino acids and derivatives	Amino acids and derivatives	59-92-7
3-Hydroxy-3-methylpentane-1,5-dioic acid	Amino acids and derivatives	Amino acids and derivatives	503-49-1
3-Methyl-L-Histidine	Amino acids and derivatives	Amino acids and derivatives	368-16-1
4-Hydroxy-L-glutamic acid	Amino acids and derivatives	Amino acids and derivatives	3913-68-6
5-Aminovaleric acid	Amino acids and derivatives	Amino acids and derivatives	660-88-8
5-Hydroxy-L-tryptophan	Amino acids and derivatives	Amino acids and derivatives	56-69-9
5-L-Glutamyl-L-amino acid	Amino acids and derivatives	Amino acids and derivatives	5875-41-2
5-Oxo-L-Proline	Amino acids and derivatives	Amino acids and derivatives	98-79-3
Cycloleucine	Amino acids and derivatives	Amino acids and derivatives	52-52-8
D-Proline betaine	Amino acids and derivatives	Amino acids and derivatives	1195-94-4
Glutathione reduced form	Amino acids and derivatives	Amino acids and derivatives	70-18-8
L-Alanyl-L-Alanine	Amino acids and derivatives	Amino acids and derivatives	1948-31-8
L-Alanyl-L-leucine	Amino acids and derivatives	Amino acids and derivatives	3303-34-2
L-Alanyl-L-Phenylalanine	Amino acids and derivatives	Amino acids and derivatives	3061-90-3
L-Asparagine	Amino acids and derivatives	Amino acids and derivatives	70-47-3
L-Aspartic Acid	Amino acids and derivatives	Amino acids and derivatives	56-84-8
L-Aspartic acid-O-diglucoside	Amino acids and derivatives	Amino acids and derivatives	-
L-Aspartyl-L-Phenylalanine	Amino acids and derivatives	Amino acids and derivatives	13433-09-5
L-Citrulline	Amino acids and derivatives	Amino acids and derivatives	372-75-8
L-Cysteine	Amino acids and derivatives	Amino acids and derivatives	52-90-4
L-Glutamic acid	Amino acids and derivatives	Amino acids and derivatives	56-86-0
L-Glutamic acid-O-glycoside	Amino acids and derivatives	Amino acids and derivatives	-
L-Glutamine	Amino acids and derivatives	Amino acids and derivatives	56-85-9
L-Glutamine-O-glycoside	Amino acids and derivatives	Amino acids and derivatives	-
L-Glycyl-L-isoleucine	Amino acids and derivatives	Amino acids and derivatives	19461-38-2
L-Glycyl-L-phenylalanine	Amino acids and derivatives	Amino acids and derivatives	721-66-4
L-Glycyl-L-proline	Amino acids and derivatives	Amino acids and derivatives	704-15-4
L-Homocitrulline	Amino acids and derivatives	Amino acids and derivatives	1190-49-4
L-Homocysteine	Amino acids and derivatives	Amino acids and derivatives	6027-13-0
L-Homocystine	Amino acids and derivatives	Amino acids and derivatives	626-72-2
L-Homomethionine	Amino acids and derivatives	Amino acids and derivatives	25148-30-5
L-Isoleucine	Amino acids and derivatives	Amino acids and derivatives	73-32-5
L-Isoleucyl-L-Aspartate	Amino acids and derivatives	Amino acids and derivatives	-
L-Leucine	Amino acids and derivatives	Amino acids and derivatives	61-90-5
L-Leucyl-L-Leucine	Amino acids and derivatives	Amino acids and derivatives	3303-31-9
L-Leucyl-L-phenylalanine	Amino acids and derivatives	Amino acids and derivatives	56217-82-4
L-Lysine	Amino acids and derivatives	Amino acids and derivatives	56-87-1
L-Lysine-Butanoic Acid	Amino acids and derivatives	Amino acids and derivatives	80407-71-2
L-Methionine	Amino acids and derivatives	Amino acids and derivatives	63-68-3
L-Methionine methyl ester	Amino acids and derivatives	Amino acids and derivatives	10332-17-9
L-Methionine Sulfoxide	Amino acids and derivatives	Amino acids and derivatives	3226-65-1
L-Norleucine	Amino acids and derivatives	Amino acids and derivatives	327-57-1
L-Ornithine	Amino acids and derivatives	Amino acids and derivatives	70-26-8
L-Phenylalanine	Amino acids and derivatives	Amino acids and derivatives	63-91-2
L-Phenylalanyl-L-phenylalanine	Amino acids and derivatives	Amino acids and derivatives	2577-40-4
L-Proline	Amino acids and derivatives	Amino acids and derivatives	147-85-3
L-Prolyl-L-Leucine	Amino acids and derivatives	Amino acids and derivatives	52899-07-7
L-Prolyl-L-Phenylalanine	Amino acids and derivatives	Amino acids and derivatives	13589-02-1
L-Saccharopine	Amino acids and derivatives	Amino acids and derivatives	997-68-2
L-threo-3-Methylaspartate	Amino acids and derivatives	Amino acids and derivatives	6061-13-8
L-Threonine	Amino acids and derivatives	Amino acids and derivatives	72-19-5
L-Tryptophan	Amino acids and derivatives	Amino acids and derivatives	73-22-3
L-Tyramine	Amino acids and derivatives	Amino acids and derivatives	51-67-2
L-Tyrosine	Amino acids and derivatives	Amino acids and derivatives	60-18-4
L-Valine	Amino acids and derivatives	Amino acids and derivatives	72-18-4
L-Valyl-L-Leucine	Amino acids and derivatives	Amino acids and derivatives	3989-97-7
L-Valyl-L-Phenylalanine	Amino acids and derivatives	Amino acids and derivatives	3918-92-1
N,N-Dimethylglycine	Amino acids and derivatives	Amino acids and derivatives	1118-68-9
N6-Acetyl-L-lysine	Amino acids and derivatives	Amino acids and derivatives	692-04-6
N-Acetyl-L-Arginine	Amino acids and derivatives	Amino acids and derivatives	155-84-0
N-Acetyl-L-glutamic acid	Amino acids and derivatives	Amino acids and derivatives	1188-37-0
N-Acetyl-L-Glutamine	Amino acids and derivatives	Amino acids and derivatives	2490-97-3
N-Acetyl-L-glycine	Amino acids and derivatives	Amino acids and derivatives	543-24-8
N-Acetyl-L-leucine	Amino acids and derivatives	Amino acids and derivatives	1188-21-2
N-Acetyl-L-methionine	Amino acids and derivatives	Amino acids and derivatives	65-82-7
N-Acetyl-L-phenylalanine	Amino acids and derivatives	Amino acids and derivatives	2018-61-3
N-Acetyl-L-threonine	Amino acids and derivatives	Amino acids and derivatives	17093-74-2
N-Acetyl-L-Tryptophan	Amino acids and derivatives	Amino acids and derivatives	1218-34-4
N-Acetyl-L-tyrosine	Amino acids and derivatives	Amino acids and derivatives	537-55-3
N-Formyl-L-Methionine	Amino acids and derivatives	Amino acids and derivatives	4289-98-9
NG,NG-Dimethyl-L-arginine	Amino acids and derivatives	Amino acids and derivatives	30315-93-6
N-Glycyl-L-leucine	Amino acids and derivatives	Amino acids and derivatives	869-19-2
Nicotianamine	Amino acids and derivatives	Amino acids and derivatives	34441-14-0
N-Methylglycine	Amino acids and derivatives	Amino acids and derivatives	107-97-1
N-Monomethyl-L-arginine	Amino acids and derivatives	Amino acids and derivatives	17035-90-4
N-Propionylglycine	Amino acids and derivatives	Amino acids and derivatives	21709-90-0
N-α-Acetyl-L-ornithine	Amino acids and derivatives	Amino acids and derivatives	6205-08-9
O-Acetylserine	Amino acids and derivatives	Amino acids and derivatives	5147-00-2
Oxiglutatione	Amino acids and derivatives	Amino acids and derivatives	27025-41-8
Pipecolic acid	Amino acids and derivatives	Amino acids and derivatives	4043-87-2
S-(5'-Adenosy)-L-homocysteine	Amino acids and derivatives	Amino acids and derivatives	979-92-0
S-(Methyl)glutathione	Amino acids and derivatives	Amino acids and derivatives	2922-56-7
S-Adenosyl-L-methionine	Amino acids and derivatives	Amino acids and derivatives	29908-03-0
Naringenin chalcone	Flavonoids	Chalcones	73692-50-9
Phloretin-2'-O-glucoside (Phlorizin)	Flavonoids	Chalcones	60-81-1
Butin	Flavonoids	Dihydroflavone	492-14-8
Eriodictyol (5,7,3',4'-Tetrahydroxyflavanone)	Flavonoids	Dihydroflavone	552-58-9
Eriodictyol-3'-O-glucoside	Flavonoids	Dihydroflavone	-
Eriodictyol-7-O-glucoside	Flavonoids	Dihydroflavone	38965-51-4
Eriodictyol-8-C-glucoside-4'-O-glucoside	Flavonoids	Dihydroflavone	-
Naringenin (5,7,4'-Trihydroxyflavanone)	Flavonoids	Dihydroflavone	480-41-1
Naringenin-7-O-glucoside (Prunin)	Flavonoids	Dihydroflavone	529-55-5
Naringenin-7-O-Neohesperidoside(Naringin)	Flavonoids	Dihydroflavone	10236-47-2
Naringenin-7-O-Rutinoside(Narirutin)	Flavonoids	Dihydroflavone	14259-46-2
Pinocembrin (Dihydrochrysin)	Flavonoids	Dihydroflavone	480-39-7
3-O-Acetylpinobanksin	Flavonoids	Dihydroflavonol	52117-69-8
Dihydrokaempferol-3-O-glucoside	Flavonoids	Dihydroflavonol	1049-08-8
Hesperetin-5,7-di-O-glucoside	Flavonoids	Dihydroflavonol	-
Hesperetin-5-O-glucoside	Flavonoids	Dihydroflavonol	69651-80-5
Pinobanksin	Flavonoids	Dihydroflavonol	548-82-3
5,7-Dihydroxy-2',3',4'-trimethoxydihydroisoflavone	Flavonoids	Dihydroisoflavone	-
Gallocatechin-(4α→8)-catechin	Flavonoids	Flavanols	-
Gallocatechin-(4α→8)-gallocatechin	Flavonoids	Flavanols	-
"Vitexin-2""-O-galactoside"	Flavonoids	Flavones	-
3',4',7-Trihydroxyflavone	Flavonoids	Flavones	2150-11-0
4',5,7-Trihydroxy-3',6-dimethoxyflavone (Jaceosidin)	Flavonoids	Flavones	18085-97-7
5,2'-Dihydroxy-7,8-dimethoxyflavone glycosides	Flavonoids	Flavones	-
5,7-Dihydroxy-3',4',5'-trimethoxyflavone	Flavonoids	Flavones	18103-42-9
6,7,8-Tetrahydroxy-5-methoxyflavone	Flavonoids	Flavones	-
6-C-MethylKaempferol-3-glucoside	Flavonoids	Flavones	-
6-Methoxykaempferol-3-O-glucoside	Flavonoids	Flavones	63422-27-5
Apigenin	Flavonoids	Flavones	520-36-5
Apigenin-5-O-glucoside	Flavonoids	Flavones	28757-27-9
Apigenin-6,8-di-C-glucoside (Vicenin-2)	Flavonoids	Flavones	23666-13-9
Apigenin-6,8-di-C-glucoside-4'-O-glucoside	Flavonoids	Flavones	-
Apigenin-7,4'-dimethyl ether	Flavonoids	Flavones	5128-44-9
Apigenin-7-O-(6''-malonyl)glucoside	Flavonoids	Flavones	86546-87-4
Apigenin-7-O-(6''-p-Coumaryl)glucoside	Flavonoids	Flavones	-
Apigenin-7-O-glucoside(Cosmosiin)	Flavonoids	Flavones	578-74-5
Apigenin-7-O-glucoside-4'-O-rutinoside	Flavonoids	Flavones	-
Apigenin-7-O-glucuronide	Flavonoids	Flavones	29741-09-1
Apigenin-7-O-neohesperidoside (Rhoifolin)	Flavonoids	Flavones	17306-46-6
Apigenin-7-O-rutinoside (Isorhoifolin)	Flavonoids	Flavones	552-57-8
Apigenin-8-C-Arabinoside	Flavonoids	Flavones	-
Aromadendrin-7-O-glucoside	Flavonoids	Flavones	28189-90-4
Butin-7-O-glucoside	Flavonoids	Flavones	-
Chrysin	Flavonoids	Flavones	480-40-0
Chrysoeriol-5,7-di-O-glucoside	Flavonoids	Flavones	-
Chrysoeriol-6-C-glucoside (Isoscoparin)	Flavonoids	Flavones	20013-23-4
Chrysoeriol-6-C-glucoside-4'-O-glucoside	Flavonoids	Flavones	-
Chrysoeriol-7-O-(6''-malonyl)glucoside	Flavonoids	Flavones	-
Chrysoeriol-7-O-(6''-sinapoyl)glucoside	Flavonoids	Flavones	-
Chrysoeriol-7-O-glucoside	Flavonoids	Flavones	19993-32-9
Chrysoeriol-7-O-rutinoside	Flavonoids	Flavones	-
Chrysoeriol-8-C-glucoside (Scoparin)	Flavonoids	Flavones	301-16-6
Dhurrin-6'-O-Glucoside	Flavonoids	Flavones	-
Diosmetin (5,7,3'-Trihydroxy-4'-methoxyflavone)	Flavonoids	Flavones	520-34-3
Diosmetin-6-C-glucoside	Flavonoids	Flavones	-
Diosmetin-7-O-(6''-malonyl)glucoside	Flavonoids	Flavones	-
Diosmetin-7-O-galactoside	Flavonoids	Flavones	-
Diosmetin-7-O-glucuronide	Flavonoids	Flavones	35110-20-4
Diosmetin-7-O-Neohesperidoside (Neodiosmin)	Flavonoids	Flavones	38665-01-9
Diosmetin-7-O-rutinoside (Diosmin)	Flavonoids	Flavones	520-27-4
Eupatilin-7-O-glucoside	Flavonoids	Flavones	-
Galangin-7-O-glucoside	Flavonoids	Flavones	-
Hesperetin-7-O-glucoside	Flavonoids	Flavones	31712-49-9
Hispidulin (5,7,4'-Trihydroxy-6-methoxyflavone)	Flavonoids	Flavones	1447-88-7
Hispidulin-7-O-(6''-O-p-Coumaroyl)Glucoside	Flavonoids	Flavones	-
Isoluteolin-6,8-di-C-glucoside	Flavonoids	Flavones	-
Isorhamnetin-3-O-(6''-malonylglucoside)	Flavonoids	Flavones	-
Isorhamnetin-3-O-rutinoside (Narcissin)	Flavonoids	Flavones	604-80-8
Isovitexin-2''-O-(6'''-feruloyl)glucoside	Flavonoids	Flavones	-
Isovitexin-2''-O-(6'''-p-coumaroyl)glucoside	Flavonoids	Flavones	-
Jaceosidin-7-O-Glucoside	Flavonoids	Flavones	25474-11-7
Kaempferol-3,7-di-O-glucoside	Flavonoids	Flavones	-
Kaempferol-3-O-rutinoside(Nicotiflorin)	Flavonoids	Flavones	17650-84-9
Kaempferol-4'-O-glucoside	Flavonoids	Flavones	-
Kaempferol-6,8-di-C-glucoside	Flavonoids	Flavones	-
Limocitrin-3-O-galactoside	Flavonoids	Flavones	-
Limocitrin-7-O-glucoside	Flavonoids	Flavones	-
Luteolin (5,7,3',4'-Tetrahydroxyflavone)	Flavonoids	Flavones	491-70-3
Luteolin-3'-O-glucoside	Flavonoids	Flavones	5154-41-6
Luteolin-4'-O-glucoside	Flavonoids	Flavones	6920-38-3
Luteolin-7,3'-di-O-glucoside	Flavonoids	Flavones	52187-80-1
Luteolin-7-O-(6''-sinapoyl)glucoside	Flavonoids	Flavones	-
Luteolin-7-O-gentiobioside	Flavonoids	Flavones	-
Luteolin-7-O-glucoside (Cynaroside)	Flavonoids	Flavones	5373-11-5
Luteolin-7-O-glucuronide	Flavonoids	Flavones	29741-10-4
Luteolin-7-O-neohesperidoside (Lonicerin)	Flavonoids	Flavones	25694-72-8
Luteolin-7-O-rutinoside	Flavonoids	Flavones	3563-98-2
Naringenin-4'-O-glucoside	Flavonoids	Flavones	-
Nepetin (5,7,3',4'-Tetrahydroxy-6-methoxyflavone)	Flavonoids	Flavones	520-11-6
Nepetin-7-O-glucoside	Flavonoids	Flavones	569-90-4
Orientin-2''-O-galactoside	Flavonoids	Flavones	-
Rhamnocitrin (7-Methylkaempferol)	Flavonoids	Flavones	569-92-6
Salcolin A	Flavonoids	Flavones	-
Salcolin B	Flavonoids	Flavones	-
Saponarin-4'-O-glucoside	Flavonoids	Flavones	-
Scutellarein-7-O-glucuronide (Scutellarin)	Flavonoids	Flavones	27740-01-8
Syringetin-7-O-glucoside	Flavonoids	Flavones	-
Tamarixetin-3-O-rutinoside	Flavonoids	Flavones	-
Tectochrysin	Flavonoids	Flavones	520-28-5
Tetahydroxyflavone-7-O-glucuronide	Flavonoids	Flavones	-
Tricin (5,7,4'-Trihydroxy-3',5'-dimethoxyflavone)	Flavonoids	Flavones	520-32-1
Tricin-4'-O-(guaiacylglycerol)ether	Flavonoids	Flavones	-
Tricin-4'-O-(guaiacylglycerol)ether-7-O-glucoside	Flavonoids	Flavones	-
Tricin-4'-O-(syringyl alcohol)ether-5-O-glucoside	Flavonoids	Flavones	-
Tricin-4'-O-(syringyl alcohol)ether-7-O-glucoside	Flavonoids	Flavones	-
Tricin-4'-O-(β-guaiacylglycerol)ether-7-O-(6''-malonyl)glucoside	Flavonoids	Flavones	-
Tricin-4'-O-[β-guaiacyl-(9''-O-acetyl)glycerol]ether	Flavonoids	Flavones	-
Tricin-4'-O-Benzoic Acid	Flavonoids	Flavones	-
Tricin-4'-O-eudesmic acid	Flavonoids	Flavones	-
Tricin-4'-O-glucoside	Flavonoids	Flavones	-
Tricin-4'-O-glucoside-7-O-glucoside	Flavonoids	Flavones	-
Tricin-4'-O-glycerol	Flavonoids	Flavones	-
Tricin-4'-O-syringic acid	Flavonoids	Flavones	-
Tricin-4'-O-syringyl alcohol	Flavonoids	Flavones	-
Tricin-5,7-O-diglucoside	Flavonoids	Flavones	-
Tricin-5-O-Glucoside	Flavonoids	Flavones	32769-00-9
Tricin-5-O-guaiacylglycerol	Flavonoids	Flavones	-
Tricin-7-O-(2''-Malonyl)rhamnoside	Flavonoids	Flavones	-
Tricin-7-O-(2''-O-glucosyl)glucoside	Flavonoids	Flavones	-
Tricin-7-O-(2''-Sinapoyl)glucoside	Flavonoids	Flavones	-
Tricin-7-O-(6''-Malonyl)Glucoside	Flavonoids	Flavones	-
Tricin-7-O-(6''-O-malonyl)glucoside	Flavonoids	Flavones	-
Tricin-7-O-Glucoside	Flavonoids	Flavones	32769-01-0
Tricin-7-O-Glucuronide	Flavonoids	Flavones	-
Tricin-7-O-glucuronyl(2→1)glucuronide	Flavonoids	Flavones	83097-44-3
Tricin-7-O-neohesperidoside	Flavonoids	Flavones	53766-40-8
Tricin-7-O-rutinoside	Flavonoids	Flavones	-
Tricin-7-O-saccharic acid	Flavonoids	Flavones	-
Vanillyl-O-Vitexin	Flavonoids	Flavones	-
Vitexin-7-O-rutinoside	Flavonoids	Flavones	-
Apigenin-6,8-di-C-arabinoside	Flavonoids	Flavonoid carbonoside	-
Apigenin-6-C-(2''-glucosyl)arabinoside	Flavonoids	Flavonoid carbonoside	-
Apigenin-6-C-(2''-glucuronyl)xyloside	Flavonoids	Flavonoid carbonoside	-
Apigenin-6-C-arabinoside-8-C-xyloside	Flavonoids	Flavonoid carbonoside	-
Apigenin-6-C-glucoside (Isovitexin)	Flavonoids	Flavonoid carbonoside	29702-25-8
Apigenin-6-C-xyloside-8-C-arabinoside	Flavonoids	Flavonoid carbonoside	-
Apigenin-8-C-(2''-glucosyl)arabinoside	Flavonoids	Flavonoid carbonoside	-
Apigenin-8-C-Glucoside (Vitexin)	Flavonoids	Flavonoid carbonoside	3681-93-4
Chrysoeriol-6,8-di-C-glucoside	Flavonoids	Flavonoid carbonoside	-
Diosmetin-8-C-(2''-O-rhamnosyl)glucoside	Flavonoids	Flavonoid carbonoside	98891-92-0
Hesperetin-8-C-glucoside-3'-O-glucoside	Flavonoids	Flavonoid carbonoside	-
Hispidulin-8-C-(2''-O-glucosyl)glucoside	Flavonoids	Flavonoid carbonoside	-
Hispidulin-8-C-glucoside	Flavonoids	Flavonoid carbonoside	-
Isoorientin-7-O-(6''-p-coumaroyl)glucoside	Flavonoids	Flavonoid carbonoside	-
Isoorientin-7-O-glucoside	Flavonoids	Flavonoid carbonoside	-
Isosaponarin(Isovitexin-4'-O-glucoside)	Flavonoids	Flavonoid carbonoside	19416-87-6
Isoschaftoside	Flavonoids	Flavonoid carbonoside	52012-29-0
Isovitexin-2''-O-rhamnoside	Flavonoids	Flavonoid carbonoside	-
Isovitexin-7-O-glucoside(Saponarin)	Flavonoids	Flavonoid carbonoside	20310-89-8
Isovitexin-7-O-glucoside-2''-O-rhamnoside	Flavonoids	Flavonoid carbonoside	-
Isovitexin-8-O-xylcoside	Flavonoids	Flavonoid carbonoside	-
Luteolin-6,8-di-C-glucoside	Flavonoids	Flavonoid carbonoside	29428-58-8
Luteolin-6-C-glucoside (Isoorientin)	Flavonoids	Flavonoid carbonoside	4261-42-1
Luteolin-6-C-rhamnoside-7-O-glucoside	Flavonoids	Flavonoid carbonoside	-
Luteolin-8-C-glucoside (Orientin)	Flavonoids	Flavonoid carbonoside	28608-75-5
Orientin-6-C-arabinoside	Flavonoids	Flavonoid carbonoside	-
Orientin-7-O-arabinoside	Flavonoids	Flavonoid carbonoside	-
Orientin-7-O-glucoside	Flavonoids	Flavonoid carbonoside	-
Schaftoside	Flavonoids	Flavonoid carbonoside	51938-32-0
Swertiajaponin	Flavonoids	Flavonoid carbonoside	6980-25-2
Vitexin-2''-O-glucoside	Flavonoids	Flavonoid carbonoside	61360-94-9
Vitexin-2''-O-rhamnoside	Flavonoids	Flavonoid carbonoside	64820-99-1
Vitexin-7-O-(6''-feruloyl)glucoside	Flavonoids	Flavonoid carbonoside	-
Vitexin-7-O-(6''-p-coumaroyl)glucoside	Flavonoids	Flavonoid carbonoside	-
3,5,6,7,8,3',4'-Heptamethoxyflavone	Flavonoids	Flavonols	1178-24-1
3-O-Methylquercetin	Flavonoids	Flavonols	1486-70-0
6-Hydroxykaempferol-7-O-glucoside	Flavonoids	Flavonols	-
Dihydrokaempferol-7-O-glucoside	Flavonoids	Flavonols	-
Isohyperoside	Flavonoids	Flavonols	35589-21-0
Isorhamnetin-3,7-O-diglucoside	Flavonoids	Flavonols	6758-51-6
Isorhamnetin-3-O-(6''-acetylglucoside)	Flavonoids	Flavonols	-
Isorhamnetin-3-O-Glucoside	Flavonoids	Flavonols	5041-82-7
Isorhamnetin-3-O-sophoroside	Flavonoids	Flavonols	-
Isorhamnetin-7-O-glucoside (Brassicin)	Flavonoids	Flavonols	6743-96-0
Kaempferol-3-O-(6''-acetyl)glucoside	Flavonoids	Flavonols	-
Kaempferol-3-O-(6''-malonyl)galactoside	Flavonoids	Flavonols	-
Kaempferol-3-O-galactoside (Trifolin)	Flavonoids	Flavonols	23627-87-4
Kaempferol-3-O-glucoside (Astragalin)	Flavonoids	Flavonols	480-10-4
Kaempferol-3-O-glucuronide	Flavonoids	Flavonols	22688-78-4
Kaempferol-3-O-neohesperidoside	Flavonoids	Flavonols	32602-81-6
Kaempferol-3-O-robinobioside(Biorobin)	Flavonoids	Flavonols	17297-56-2
Kaempferol-7-O-glucuronide	Flavonoids	Flavonols	-
Kumatakenin	Flavonoids	Flavonols	3301-49-3
Quercetin-3,4'-Dimethyl Ether	Flavonoids	Flavonols	33429-83-3
Quercetin-3',4'-dimethyl ether	Flavonoids	Flavonols	3306-29-4
Quercetin-3-O-(2''-O-galactosyl)glucoside	Flavonoids	Flavonols	56782-99-1
Quercetin-3-O-(4''-O-glucosyl)rhamnoside	Flavonoids	Flavonols	59262-54-3
Quercetin-3-O-(6''-acetyl)glucoside	Flavonoids	Flavonols	-
Quercetin-3-O-galactoside (Hyperin)	Flavonoids	Flavonols	482-36-0
Quercetin-3-O-glucoside (Isoquercitrin)	Flavonoids	Flavonols	482-35-9
Quercetin-3-O-glucuronide	Flavonoids	Flavonols	22688-79-5
Quercetin-3-O-neohesperidoside	Flavonoids	Flavonols	117611-67-3
Quercetin-3-O-robinobioside	Flavonoids	Flavonols	52525-35-6
Quercetin-3-O-rutinoside (Rutin)	Flavonoids	Flavonols	153-18-4
Quercetin-4'-O-glucoside (Spiraeoside)	Flavonoids	Flavonols	20229-56-5
Quercetin-7-O-(6''-malonyl)glucoside	Flavonoids	Flavonols	-
Quercetin-7-O-glucoside	Flavonoids	Flavonols	491-50-9
Quercetin-7-O-rutinoside	Flavonoids	Flavonols	147714-62-3
Rhamnetin-3-O-Glucoside	Flavonoids	Flavonols	27875-34-9
Tricin-4'-methylether-3'-O-glucoside	Flavonoids	Flavonols	-
5,7,4'-Trihydroxy-6,8-dimethoxyisoflavone-7-O-galactoside	Flavonoids	Isoflavones	-
5,7,4'-Trihydroxy-6,8-dimethoxyisoflavone-7-O-galactoside-rhamnose	Flavonoids	Isoflavones	-
6''-O-Malonylgenistin	Flavonoids	Isoflavones	51011-05-3
Genistein-7-O-galactoside	Flavonoids	Isoflavones	-
Genistein-7-O-galactoside-rhamnose	Flavonoids	Isoflavones	-
Genistein-7-O-Glucoside (Genistin)	Flavonoids	Isoflavones	529-59-9
Genistein-8-C-glucoside	Flavonoids	Isoflavones	66026-80-0
Pratensein	Flavonoids	Isoflavones	2284-31-3
1-Methoxyphaseollin	Lignans and Coumarins	Coumarins	157226-48-7
4-Hydroxy-7-methoxycoumarin-β-rhamnoside	Lignans and Coumarins	Coumarins	-
4-Hydroxycoumarin	Lignans and Coumarins	Coumarins	1076-38-6
6-MethylCoumarin	Lignans and Coumarins	Coumarins	92-48-8
7-Methoxycoumarin	Lignans and Coumarins	Coumarins	531-59-9
Ayapin	Lignans and Coumarins	Coumarins	494-56-4
Coumarin	Lignans and Coumarins	Coumarins	91-64-5
Coumarin O-rutinoside	Lignans and Coumarins	Coumarins	-
Esculetin-7-O-glucoside	Lignans and Coumarins	Coumarins	-
Esculetin-7-O-quinic acid	Lignans and Coumarins	Coumarins	-
Esculin (6,7-DihydroxyCoumarin-6-glucoside)	Lignans and Coumarins	Coumarins	531-75-9
Fraxetin (7,8-Dihydroxy-6-methoxycoumarin)	Lignans and Coumarins	Coumarins	574-84-5
Isoscopoletin (6-Hydroxy-7-Methoxycoumarin)	Lignans and Coumarins	Coumarins	776-86-3
O-Feruloyl 3-hydroxycoumarin	Lignans and Coumarins	Coumarins	-
Scoparone	Lignans and Coumarins	Coumarins	120-08-1
Scopoletin-7-O-glucoside (Scopolin)	Lignans and Coumarins	Coumarins	531-44-2
Scopoletin-7-O-glucuronide	Lignans and Coumarins	Coumarins	132752-65-9
(8'R,7'S)-(-)-8-Hydroxy-α-conidendrin	Lignans and Coumarins	Lignans	-
1-Hydroxypineolin Diglucoside	Lignans and Coumarins	Lignans	-
1-Hydroxypinoresinol-1-O-Glucoside	Lignans and Coumarins	Lignans	81495-71-8
5'-Methoxyisolariciresinol-9'-O-glucoside	Lignans and Coumarins	Lignans	-
5'-Methoxymatairesinoside	Lignans and Coumarins	Lignans	1691201-82-7
Isohydroxymatairesinol	Lignans and Coumarins	Lignans	-
Lariciresinol-4'-O-glucoside	Lignans and Coumarins	Lignans	143663-00-7
Medioresinol-4,4'-di-O-glucoside	Lignans and Coumarins	Lignans	88142-63-6
Medioresinol-4'-O-(6'''-acetyl)glucoside	Lignans and Coumarins	Lignans	-
Olivil-4'-O-glucoside	Lignans and Coumarins	Lignans	76880-93-8
Pinoresinol	Lignans and Coumarins	Lignans	487-36-5
Pinoresinol-4,4'-O-di-O-glucoside	Lignans and Coumarins	Lignans	63902-38-5
Pinoresinol-4-O-(6''-acetyl)glucoside	Lignans and Coumarins	Lignans	-
Pinoresinol-4-O-glucoside	Lignans and Coumarins	Lignans	41607-20-9
Secoisolariciresinol 4-O-glucoside	Lignans and Coumarins	Lignans	-
Syringaresinol	Lignans and Coumarins	Lignans	21453-69-0
Syringaresinol-4'-O-(6''-acetyl)glucoside	Lignans and Coumarins	Lignans	-
Syringaresinol-4'-O-glucoside	Lignans and Coumarins	Lignans	7374-79-0
(7Z)-Hexadecenoic acid	Lipids	Free fatty acids	2416-19-5
(9Z,11E)-Octadecadienoic acid	Lipids	Free fatty acids	2540-56-9
10,16-Dihydroxypalmitic acid	Lipids	Free fatty acids	3233-90-7
10-Heptadecenoic Acid	Lipids	Free fatty acids	29743-97-3
11,14,17-Eicosatrienoic acid	Lipids	Free fatty acids	17046-59-2
11-Octadecanoic acid(Vaccenic acid)	Lipids	Free fatty acids	506-17-2
12,13-DHOME; (9Z)-12,13-Dihydroxyoctadec-9-enoic acid	Lipids	Free fatty acids	263399-35-5
12,13-Epoxy-9-Octadecenoic Acid	Lipids	Free fatty acids	6799-85-5
12-Hydroxydodecanoic acid	Lipids	Free fatty acids	505-95-3
12-Oxo-phytodienoic acid	Lipids	Free fatty acids	85551-10-6
13(S)-HODE;13(S)-Hydroxyoctadeca-9Z,11E-dienoic acid	Lipids	Free fatty acids	10219-69-9
13-Hydroxy-6,9,11-octadecatrienoic acid	Lipids	Free fatty acids	74784-20-6
13-KODE; (9Z,11E)-13-Oxooctadeca-9,11-dienoic acid	Lipids	Free fatty acids	54739-30-9
13S-Hydroperoxy-6Z,9Z,11E-octadecatrienoic acid	Lipids	Free fatty acids	121107-97-9
13S-Hydroperoxy-9Z,11E-octadecadienoic acid	Lipids	Free fatty acids	33964-75-9
13S-Hydroxy-9Z,11E,15Z-octadecatrienoic acid	Lipids	Free fatty acids	87984-82-5
15(R)-Hydroxylinoleic Acid	Lipids	Free fatty acids	177931-23-6
1-Eicosanol	Lipids	Free fatty acids	629-96-9
2R-Hydroxyoctadecanoic Acid	Lipids	Free fatty acids	26633-48-7
3-Hydroxyoctadecanoic Acid	Lipids	Free fatty acids	45261-96-9
4-Oxo-9Z,11Z,13E,15E-Octadecatetraenoic Acid	Lipids	Free fatty acids	-
5S,8R-DiHODE; (5S,8R,9Z,12Z)-5,8-Dihydroxyoctadeca-9,12-dienoate	Lipids	Free fatty acids	-
7S,8S-DiHODE; (9Z,12Z)-(7S,8S)-Dihydroxyoctadeca-9,12-dienoic acid	Lipids	Free fatty acids	143288-65-7
9(10)-EpOME;(9R,10S)-(12Z)-9,10-Epoxyoctadecenoic acid	Lipids	Free fatty acids	16833-56-0
9,10,13-Trihydroxy-11-Octadecenoic Acid	Lipids	Free fatty acids	29907-57-1
9,10-DHOME; (12Z)-9,10-Dihydroxyoctadec-12-enoic acid	Lipids	Free fatty acids	263399-34-4
9,10-Dihydroxy-12,13-epoxyoctadecanoic acid	Lipids	Free fatty acids	-
9,10-Epoxyoctadecanoic Acid	Lipids	Free fatty acids	2443-39-2
9,12,13-Trihydroxy-10,15-octadecadienoic acid	Lipids	Free fatty acids	-
9,12-Octadecadien-6-Ynoic Acid	Lipids	Free fatty acids	61481-29-6
9-Hydroperoxy-10E,12,15Z-octadecatrienoic acid	Lipids	Free fatty acids	111004-08-1
9-Hydroxy-10,12,15-octadecatrienoic acid	Lipids	Free fatty acids	89886-42-0
9-Hydroxy-12-oxo-15(Z)-octadecenoic acid	Lipids	Free fatty acids	-
9-Hydroxy-13-oxo-10-octadecenoic Acid	Lipids	Free fatty acids	-
9-Oxo-10E,12Z-octadecadienoic acid	Lipids	Free fatty acids	54232-59-6
9-Oxo-12Z-Octadecenoic acid	Lipids	Free fatty acids	112543-32-5
9S-Hydroperoxy-10E,12Z-octadecadienoic acid	Lipids	Free fatty acids	5502-91-0
9S-Hydroxy-10E,12Z-octadecadienoic acid	Lipids	Free fatty acids	15514-85-9
Arachidic acid	Lipids	Free fatty acids	506-30-9
Arachidonic Acid	Lipids	Free fatty acids	506-32-1
Cis-4,7,10,13,16,19-Docosahexaenoic Acid	Lipids	Free fatty acids	6217-54-5
Cis-5,8,11,14,17-Eicosapentaenoic Acid	Lipids	Free fatty acids	10417-94-4
Crepenynic acid	Lipids	Free fatty acids	2277-31-8
Dihomo-gamma-linolenic acid; (8Z,11Z,14Z)-Icosatrienoic acid	Lipids	Free fatty acids	1783-84-2
Docosanoic acid (Behenic acid)	Lipids	Free fatty acids	112-85-6
Dodecanoic acid (Lauric acid)	Lipids	Free fatty acids	143-07-7
E,E,Z-1,3,12-Nonadecatriene-5,14-diol	Lipids	Free fatty acids	-
Eicosadienoic acid	Lipids	Free fatty acids	5598-38-9
Eicosenoic acid	Lipids	Free fatty acids	26764-41-0
Elaidic Acid	Lipids	Free fatty acids	112-79-8
Heptadecanoic acid	Lipids	Free fatty acids	506-12-7
Linoleic acid	Lipids	Free fatty acids	60-33-3
Methyl 7,10-hexadecadienoate	Lipids	Free fatty acids	-
Methyl palmitate	Lipids	Free fatty acids	112-39-0
Myristic Acid	Lipids	Free fatty acids	544-63-8
Myristoleic acid	Lipids	Free fatty acids	544-64-9
Octadeca-11E,13E,15Z-trienoic acid	Lipids	Free fatty acids	25575-00-2
Oleamide (9-Octadecenamide)	Lipids	Free fatty acids	301-02-0
Palmitaldehyde	Lipids	Free fatty acids	629-80-1
Palmitic acid	Lipids	Free fatty acids	57-10-3
Palmitoleic Acid	Lipids	Free fatty acids	373-49-9
Pentadecanoic Acid	Lipids	Free fatty acids	1002-84-2
Punicic acid (9Z,11E,13Z-octadecatrienoic acid)	Lipids	Free fatty acids	544-72-9
Stearic Acid	Lipids	Free fatty acids	57-11-4
Tridecanoic Acid	Lipids	Free fatty acids	638-53-9
Undecylic Acid	Lipids	Free fatty acids	112-37-8
α-Linolenic Acid	Lipids	Free fatty acids	463-40-1
γ-Linolenic Acid	Lipids	Free fatty acids	506-26-3
1-Linoleoylglycerol	Lipids	Glycerol ester	2277-28-3
1-Linoleoylglycerol-2,3-di-O-glucoside	Lipids	Glycerol ester	-
1-Linoleoylglycerol-3-O-glucoside	Lipids	Glycerol ester	-
1-O-Caffeoyl-3-O-p-coumaroylglycerol	Lipids	Glycerol ester	-
1-Oleoyl-Sn-Glycerol	Lipids	Glycerol ester	129784-87-8
1-Stearidonoyl-Glycerol	Lipids	Glycerol ester	-
1-α-Linolenoyl-glycerol	Lipids	Glycerol ester	-
1-α-Linolenoyl-glycerol-2,3-di-O-glucoside	Lipids	Glycerol ester	-
1-α-Linolenoyl-glycerol-3-O-glucoside	Lipids	Glycerol ester	-
2-Linoleoylglycerol	Lipids	Glycerol ester	3443-82-1
2-Linoleoylglycerol-1,3-di-O-glucoside	Lipids	Glycerol ester	-
2-Linoleoylglycerol-1-O-glucoside	Lipids	Glycerol ester	-
2-α-Linolenoyl-glycerol	Lipids	Glycerol ester	55268-58-1
2-α-Linolenoyl-glycerol-1,3-di-O-glucoside	Lipids	Glycerol ester	-
2-α-Linolenoyl-glycerol-1-O-glucoside	Lipids	Glycerol ester	-
LysoPG 16:0	Lipids	Glycerol ester	-
LysoPI 16:0	Lipids	Glycerol ester	-
Monopalmitin	Lipids	Glycerol ester	542-44-9
LysoPC 12:0	Lipids	LPC	20559-18-6
LysoPC 14:0	Lipids	LPC	20559-16-4
LysoPC 15:0	Lipids	LPC	108273-89-8
LysoPC 15:1	Lipids	LPC	-
LysoPC 16:0	Lipids	LPC	17364-16-8
LysoPC 16:0(2n isomer)	Lipids	LPC	-
LysoPC 16:1	Lipids	LPC	76790-27-7
LysoPC 16:1(2n isomer)	Lipids	LPC	-
LysoPC 16:2	Lipids	LPC	-
LysoPC 16:2(2n isomer)	Lipids	LPC	-
LysoPC 16:4	Lipids	LPC	-
LysoPC 17:0	Lipids	LPC	50930-23-9
LysoPC 17:1	Lipids	LPC	-
LysoPC 17:2	Lipids	LPC	-
LysoPC 18:0	Lipids	LPC	19420-57-6
LysoPC 18:0(2n isomer)	Lipids	LPC	-
LysoPC 18:1	Lipids	LPC	-
LysoPC 18:1(2n isomer)	Lipids	LPC	-
LysoPC 18:2(2n isomer)	Lipids	LPC	-
LysoPC 18:3(2n isomer)	Lipids	LPC	-
LysoPC 18:4	Lipids	LPC	-
LysoPC 19:0	Lipids	LPC	108273-88-7
LysoPC 19:1	Lipids	LPC	-
LysoPC 19:2	Lipids	LPC	-
LysoPC 19:2(2n isomer)	Lipids	LPC	-
LysoPC 19:3	Lipids	LPC	-
LysoPC 20:0	Lipids	LPC	108341-80-6
LysoPC 20:1	Lipids	LPC	-
LysoPC 20:2	Lipids	LPC	-
LysoPC 20:2(2n isomer)	Lipids	LPC	-
LysoPC 20:3	Lipids	LPC	1199257-41-4
LysoPC 20:4	Lipids	LPC	-
LysoPC 20:5	Lipids	LPC	162440-04-2
LysoPC 22:4	Lipids	LPC	-
LysoPC 22:5	Lipids	LPC	-
LysoPC 22:5(2n isomer)	Lipids	LPC	-
LysoPC 22:6	Lipids	LPC	-
LysoPE 14:0	Lipids	LPE	-
LysoPE 14:0(2n isomer)	Lipids	LPE	-
LysoPE 15:0	Lipids	LPE	-
LysoPE 15:0(2n isomer)	Lipids	LPE	-
LysoPE 15:1	Lipids	LPE	-
LysoPE 15:1(2n isomer)	Lipids	LPE	-
LysoPE 16:0	Lipids	LPE	53862-35-4
LysoPE 16:0(2n isomer)	Lipids	LPE	-
LysoPE 16:1(2n isomer)	Lipids	LPE	-
LysoPE 16:1	Lipids	LPE	-
LysoPE 16:3	Lipids	LPE	-
LysoPE 17:0	Lipids	LPE	-
LysoPE 17:1	Lipids	LPE	-
LysoPE 17:1(2n isomer)	Lipids	LPE	-
LysoPE 18:0	Lipids	LPE	69747-55-3
LysoPE 18:1	Lipids	LPE	89576-29-4
LysoPE 18:2	Lipids	LPE	-
LysoPE 18:2(2n isomer)	Lipids	LPE	-
LysoPE 18:3(2n isomer)	Lipids	LPE	-
LysoPE 18:3	Lipids	LPE	-
LysoPE 18:4	Lipids	LPE	-
LysoPE 20:2	Lipids	LPE	-
LysoPE 20:2(2n isomer)	Lipids	LPE	-
LysoPE 20:3	Lipids	LPE	-
LysoPE 20:4	Lipids	LPE	-
LysoPE 20:5	Lipids	LPE	-
LysoPE 22:5	Lipids	LPE	-
Choline Alfoscerate	Lipids	PC	28319-77-9
3-Dehydrosphinganine	Lipids	Sphingolipids	16105-69-4
1-Methyladenine	Nucleotides and derivatives	Nucleotides and derivatives	5142-22-3
2-(Dimethylamino)guanosine	Nucleotides and derivatives	Nucleotides and derivatives	2140-67-2
2-Aminopurine	Nucleotides and derivatives	Nucleotides and derivatives	452-06-2
2'-Deoxyadenosine	Nucleotides and derivatives	Nucleotides and derivatives	958-09-8
2'-Deoxyadenosine-5'-monophosphate	Nucleotides and derivatives	Nucleotides and derivatives	653-63-4
2'-Deoxycytidine	Nucleotides and derivatives	Nucleotides and derivatives	951-77-9
2'-Deoxyguanosine	Nucleotides and derivatives	Nucleotides and derivatives	961-07-9
2'-Deoxyinosine-5'-monophosphate	Nucleotides and derivatives	Nucleotides and derivatives	3393-18-8
2-Deoxyribose-1-phosphate	Nucleotides and derivatives	Nucleotides and derivatives	17210-42-3
2-Deoxyribose-5'-phosphate	Nucleotides and derivatives	Nucleotides and derivatives	102916-66-5
2'-Deoxyuridine	Nucleotides and derivatives	Nucleotides and derivatives	951-78-0
2-Hydroxyadenosine	Nucleotides and derivatives	Nucleotides and derivatives	1818-71-9
3'-Adenylic Acid	Nucleotides and derivatives	Nucleotides and derivatives	84-21-9
5-Aminoimidazole ribonucleotide	Nucleotides and derivatives	Nucleotides and derivatives	25635-88-5
5'-Deoxy-5'-(methylthio)adenosine	Nucleotides and derivatives	Nucleotides and derivatives	2457-80-9
5-Methylcytosine	Nucleotides and derivatives	Nucleotides and derivatives	554-01-8
5-Methyluridine	Nucleotides and derivatives	Nucleotides and derivatives	1463-10-1
6-Methylmercaptopurine	Nucleotides and derivatives	Nucleotides and derivatives	50-66-8
7-Methylguanine	Nucleotides and derivatives	Nucleotides and derivatives	578-76-7
8-Hydroxyguanosine	Nucleotides and derivatives	Nucleotides and derivatives	3868-31-3
9-(Arabinosyl)hypoxanthine	Nucleotides and derivatives	Nucleotides and derivatives	7013-16-3
Adenine	Nucleotides and derivatives	Nucleotides and derivatives	73-24-5
Adenosine	Nucleotides and derivatives	Nucleotides and derivatives	58-61-7
Adenosine 5'-diphosphate	Nucleotides and derivatives	Nucleotides and derivatives	58-64-0
Adenosine 5'-monophosphate	Nucleotides and derivatives	Nucleotides and derivatives	61-19-8
Cordycepin (3'-Deoxyadenosine)	Nucleotides and derivatives	Nucleotides and derivatives	73-03-0
Cyclic 3',5'-Adenylic acid	Nucleotides and derivatives	Nucleotides and derivatives	60-92-4
Cytarabine	Nucleotides and derivatives	Nucleotides and derivatives	147-94-4
Cytidine	Nucleotides and derivatives	Nucleotides and derivatives	65-46-3
Cytosine	Nucleotides and derivatives	Nucleotides and derivatives	71-30-7
Guanine	Nucleotides and derivatives	Nucleotides and derivatives	73-40-5
Guanosine	Nucleotides and derivatives	Nucleotides and derivatives	118-00-3
Guanosine 3',5'-cyclic monophosphate	Nucleotides and derivatives	Nucleotides and derivatives	7665-99-8
Guanosine 5'-monophosphate	Nucleotides and derivatives	Nucleotides and derivatives	85-32-5
Hypoxanthine	Nucleotides and derivatives	Nucleotides and derivatives	68-94-0
Isoguanine	Nucleotides and derivatives	Nucleotides and derivatives	3373-53-3
Isopentenyladenine-7-N-glucoside	Nucleotides and derivatives	Nucleotides and derivatives	-
N7-Methylguanosine	Nucleotides and derivatives	Nucleotides and derivatives	20244-86-4
Nicotinic acid adenine dinucleotide	Nucleotides and derivatives	Nucleotides and derivatives	53-84-9
Succinyladenosine	Nucleotides and derivatives	Nucleotides and derivatives	4542-23-8
Thymidine	Nucleotides and derivatives	Nucleotides and derivatives	50-89-5
Thymine	Nucleotides and derivatives	Nucleotides and derivatives	65-71-4
Uracil	Nucleotides and derivatives	Nucleotides and derivatives	66-22-8
Uric acid	Nucleotides and derivatives	Nucleotides and derivatives	69-93-2
Uridine	Nucleotides and derivatives	Nucleotides and derivatives	58-96-8
Uridine 5'-diphosphate	Nucleotides and derivatives	Nucleotides and derivatives	27821-45-0
Uridine 5'-diphospho-D-glucose	Nucleotides and derivatives	Nucleotides and derivatives	133-89-1
Uridine 5'-monophosphate	Nucleotides and derivatives	Nucleotides and derivatives	58-97-9
Uridine-5'-Diphosphate-D-Xylose	Nucleotides and derivatives	Nucleotides and derivatives	3616-06-6
Xanthine	Nucleotides and derivatives	Nucleotides and derivatives	69-89-6
Xanthosine	Nucleotides and derivatives	Nucleotides and derivatives	146-80-5
β-Pseudouridine	Nucleotides and derivatives	Nucleotides and derivatives	1445-07-4
(-)-Jasmonoyl-L-Isoleucine	Organic acids	Organic acids	120330-93-0
1-Aminocyclopropane-1-carboxylic acid	Organic acids	Organic acids	22059-21-8
2,2-Dimethylsuccinic acid	Organic acids	Organic acids	597-43-3
2,3-Dihydroxy-3-Methylbutanoic Acid	Organic acids	Organic acids	1756-18-9
2,3-Dihydroxybenzoic Acid	Organic acids	Organic acids	303-38-8
2-Acetyl-2-Hydroxybutanoic Acid	Organic acids	Organic acids	-
2-Hydroxy-2-methyl-3-oxobutanoic acid	Organic acids	Organic acids	71698-08-3
2-Hydroxy-4-methylpentanoic acid	Organic acids	Organic acids	498-36-2
2-Hydroxycinnamic acid	Organic acids	Organic acids	583-17-5
2-Hydroxyglutaric Acid	Organic acids	Organic acids	13095-48-2
2-Hydroxyhexadecanoic acid	Organic acids	Organic acids	764-67-0
2-Hydroxyisocaproic acid	Organic acids	Organic acids	20312-37-2
2-Isopropylmalic Acid	Organic acids	Organic acids	49601-06-1
2-Methyl-3-oxoadipic acid	Organic acids	Organic acids	-
2-Methyl-3-oxosuccinic acid	Organic acids	Organic acids	-
2-Methylglutaric acid	Organic acids	Organic acids	617-62-9
2-Methylsuccinic acid	Organic acids	Organic acids	498-21-5
2-Oxoadipic acid	Organic acids	Organic acids	3184-35-8
2-Oxoheptanedionic acid	Organic acids	Organic acids	17126-90-8
2-Picolinic acid	Organic acids	Organic acids	98-98-6
2-Propylglutaric acid	Organic acids	Organic acids	32806-62-5
2-Propylmalic Acid	Organic acids	Organic acids	-
2-Propylsuccinic acid	Organic acids	Organic acids	618-57-5
3-Dehydro-L-Threonic Acid	Organic acids	Organic acids	-
3-Guanidinopropionic acid	Organic acids	Organic acids	353-09-3
3-Hydroxybenzoic Acid	Organic acids	Organic acids	99-06-9
3-Hydroxybutyric acid	Organic acids	Organic acids	300-85-6
3-Hydroxypropanoic acid	Organic acids	Organic acids	503-66-2
3-Isopropylmalic Acid	Organic acids	Organic acids	921-28-8
3-Methyl-2-Oxobutanoic acid	Organic acids	Organic acids	759-05-7
3-Methylmalic acid	Organic acids	Organic acids	152204-30-3
3-Ureidopropionic Acid	Organic acids	Organic acids	462-88-4
4,8-Dihydroxyquinoline-2-carboxylic acid	Organic acids	Organic acids	59-00-7
4-Acetamidobutyric acid	Organic acids	Organic acids	3025-96-5
4-Guanidinobutyric acid	Organic acids	Organic acids	463-00-3
4-Oxopentanoic Acid	Organic acids	Organic acids	123-76-2
5-Acetamidopentanoic Acid	Organic acids	Organic acids	1072-10-2
6-Aminocaproic acid	Organic acids	Organic acids	60-32-2
6-Hydroxyhexanoic acid	Organic acids	Organic acids	1191-25-9
9-Oxononanoic acid	Organic acids	Organic acids	2553-17-5
Abscisic acid	Organic acids	Organic acids	21293-29-8
Adipic Acid	Organic acids	Organic acids	124-04-9
Aminomalonic acid	Organic acids	Organic acids	1068-84-4
Argininosuccinic acid	Organic acids	Organic acids	2387-71-5
Azelaic acid	Organic acids	Organic acids	123-99-9
Benzoylformic acid	Organic acids	Organic acids	611-73-4
Cis-Aconitic acid	Organic acids	Organic acids	585-84-2
Citric Acid	Organic acids	Organic acids	77-92-9
D-Erythronolactone	Organic acids	Organic acids	15667-21-7
D-Galacturonic acid	Organic acids	Organic acids	685-73-4
Diethyl phosphate	Organic acids	Organic acids	598-02-7
Dimethylmalonic acid	Organic acids	Organic acids	595-46-0
DL-Glyceraldehyde-3-phosphate	Organic acids	Organic acids	591-59-3
Dodecanedioic aicd	Organic acids	Organic acids	693-23-2
D-Xylonic acid	Organic acids	Organic acids	526-91-0
Fumaric acid	Organic acids	Organic acids	110-17-8
Glutaric acid	Organic acids	Organic acids	110-94-1
Hydroxypyruvic acid	Organic acids	Organic acids	1113-60-6
Isocitric Acid	Organic acids	Organic acids	320-77-4
Isonicotinic acid	Organic acids	Organic acids	55-22-1
Jasmonic acid	Organic acids	Organic acids	77026-92-7
L-Homoserine	Organic acids	Organic acids	672-15-1
L-Malic acid	Organic acids	Organic acids	97-67-6
Malonic acid	Organic acids	Organic acids	141-82-2
Methyl jasmonate	Organic acids	Organic acids	1211-29-6
Methylenesuccinic acid	Organic acids	Organic acids	97-65-4
Methylmalonic acid	Organic acids	Organic acids	516-05-2
Muconic acid	Organic acids	Organic acids	1119-72-8
Phenylpyruvic acid	Organic acids	Organic acids	156-06-9
Phosphoenolpyruvate	Organic acids	Organic acids	138-08-9
Phthalic acid	Organic acids	Organic acids	88-99-3
Pimelic acid	Organic acids	Organic acids	111-16-0
Pyruvic acid	Organic acids	Organic acids	127-17-3
Quinic Acid	Organic acids	Organic acids	77-95-2
Sebacate	Organic acids	Organic acids	111-20-6
Shikimic acid	Organic acids	Organic acids	138-59-0
Suberic Acid	Organic acids	Organic acids	505-48-6
Succinic acid	Organic acids	Organic acids	110-15-6
Succinic anhydride	Organic acids	Organic acids	108-30-5
Succinic semialdehyde	Organic acids	Organic acids	692-29-5
Tartronate semialdehyde	Organic acids	Organic acids	2480-77-5
α-Ketoglutaric acid	Organic acids	Organic acids	328-50-7
β-Hydroxyisovaleric acid	Organic acids	Organic acids	625-08-1
γ-Aminobutyric acid	Organic acids	Organic acids	56-12-2
4-Methyl-5-thiazoleethanol	Others	Others	137-00-8
Dehydrodiconiferyl alcohol-4-O-glucoside	Others	Others	107870-88-2
Maltol	Others	Others	118-71-8
Methyl dioxindole-3-acetate	Others	Others	57061-18-4
Pantetheine	Others	Others	496-65-1
3-Phospho-D-glyceric acid	Others	Saccharides and Alcohols	820-11-1
D-(-)-Threose	Others	Saccharides and Alcohols	95-43-2
D(+)-Melezitose O-rhamnoside	Others	Saccharides and Alcohols	-
D-Arabinono-1,4-lactone	Others	Saccharides and Alcohols	2782-09-4
D-Arabinose	Others	Saccharides and Alcohols	10323-20-3
D-Arabitol	Others	Saccharides and Alcohols	488-82-4
D-Erythrose-4-phosphate	Others	Saccharides and Alcohols	585-18-2
D-Fructose 6-phosphate	Others	Saccharides and Alcohols	643-13-0
D-Fructose	Others	Saccharides and Alcohols	7660-25-5
D-Fructose-1,6-biphosphate	Others	Saccharides and Alcohols	488-69-7
D-Galactaric acid	Others	Saccharides and Alcohols	526-99-8
D-Glucoronic acid	Others	Saccharides and Alcohols	6556-12-3
D-Glucosamine 1-phosphate	Others	Saccharides and Alcohols	2152-75-2
D-Glucose 1,6-bisphosphate	Others	Saccharides and Alcohols	10139-18-1
D-Glucose 6-phosphate	Others	Saccharides and Alcohols	56-73-5
D-Glucose	Others	Saccharides and Alcohols	14431-43-7
D-Glucurono-6,3-lactone	Others	Saccharides and Alcohols	32449-92-6
Dihydroxyacetone phosphate	Others	Saccharides and Alcohols	57-04-5
D-Lactulose	Others	Saccharides and Alcohols	4618-18-2
D-Maltose	Others	Saccharides and Alcohols	133-99-3
D-Melezitose	Others	Saccharides and Alcohols	597-12-6
D-Panose	Others	Saccharides and Alcohols	33401-87-5
D-Panthenol	Others	Saccharides and Alcohols	81-13-0
D-Ribose	Others	Saccharides and Alcohols	50-69-1
D-Saccharic acid	Others	Saccharides and Alcohols	87-73-0
D-Sedoheptuiose 7-phosphate	Others	Saccharides and Alcohols	2646-35-7
D-Sucrose	Others	Saccharides and Alcohols	57-50-1
D-Threonic Acid	Others	Saccharides and Alcohols	3909-12-4
D-Trehalose	Others	Saccharides and Alcohols	99-20-7
Galactinol	Others	Saccharides and Alcohols	3687-64-7
Glucarate O-Phosphoric acid	Others	Saccharides and Alcohols	-
Gluconic acid	Others	Saccharides and Alcohols	526-95-4
Glucose-1-phosphate	Others	Saccharides and Alcohols	59-56-3
Inositol	Others	Saccharides and Alcohols	87-89-8
Isomaltulose	Others	Saccharides and Alcohols	13718-94-0
Lactobiose	Others	Saccharides and Alcohols	63-42-3
Melibiose	Others	Saccharides and Alcohols	585-99-9
N-Acetyl-D-galactosamine	Others	Saccharides and Alcohols	1811-31-0
N-Acetyl-D-glucosamine	Others	Saccharides and Alcohols	7512-17-6
N-Acetyl-D-mannosamine	Others	Saccharides and Alcohols	7772-94-3
Nystose	Others	Saccharides and Alcohols	13133-07-8
Raffinose	Others	Saccharides and Alcohols	512-69-6
Ribitol	Others	Saccharides and Alcohols	488-81-3
Sedoheptulose	Others	Saccharides and Alcohols	3019-74-7
Sorbitol-6-phosphate	Others	Saccharides and Alcohols	20479-58-7
Stachyose	Others	Saccharides and Alcohols	470-55-3
Trehalose 6-phosphate	Others	Saccharides and Alcohols	4484-88-2
Turanose	Others	Saccharides and Alcohols	547-25-1
Xylitol	Others	Saccharides and Alcohols	87-99-0
Piceatannol-3'-O-glucoside	Others	Stilbene	94356-26-0
Trans-resveratrol	Others	Stilbene	501-36-0
4-Pyridoxic acid	Others	Vitamin	82-82-6
4-Pyridoxic acid-O-glucoside	Others	Vitamin	-
Dehydroascorbic acid	Others	Vitamin	490-83-5
D-Pantothenic Acid	Others	Vitamin	79-83-4
L-Ascorbic acid (Vitamin C)	Others	Vitamin	50-81-7
Menatetrenone (Vitamin K2)	Others	Vitamin	11032-49-8
Nicotinamide	Others	Vitamin	98-92-0
Nicotinate D-ribonucleoside	Others	Vitamin	17720-18-2
Nicotinic acid (Vitamin B3)	Others	Vitamin	59-67-6
Pyridoxal	Others	Vitamin	66-72-8
Pyridoxal-5'-phosphate	Others	Vitamin	54-47-7
Pyridoxine	Others	Vitamin	65-23-6
Pyridoxine-5'-O-glucoside	Others	Vitamin	-
Riboflavin (Vitamin B2)	Others	Vitamin	83-88-5
1,2-O-Diferuloylglycerol	Phenolic acids	Phenolic acids	-
1,3,5-Benzenetriol	Phenolic acids	Phenolic acids	108-73-6
1,3-O-Diferuloylglycerol	Phenolic acids	Phenolic acids	83008-46-2
1,3-O-Di-p-Coumaroylglycerol	Phenolic acids	Phenolic acids	-
1-Feruloyl-sn-glycerol	Phenolic acids	Phenolic acids	-
1-O-[(E)-Caffeoyl]-D-glucose	Phenolic acids	Phenolic acids	-
1-O-[(E)-p-Cumaroyl]-D-glucose	Phenolic acids	Phenolic acids	-
1-O-Feruloyl-3-O-p-Coumaroylglycerol	Phenolic acids	Phenolic acids	-
1-O-Feruloyl-D-Glucose	Phenolic acids	Phenolic acids	-
1-O-Feruloylquinic acid	Phenolic acids	Phenolic acids	-
1-O-Gentisoyl-D-glucoside	Phenolic acids	Phenolic acids	23445-11-6
1-O-Glucosyl sinapate	Phenolic acids	Phenolic acids	78185-48-5
1-O-p-Coumaroylquinic acid	Phenolic acids	Phenolic acids	-
1-O-p-Cumaroylglycerol	Phenolic acids	Phenolic acids	106055-11-2
1-O-Salicyl-D-glucose	Phenolic acids	Phenolic acids	60517-74-0
1-O-Sinapoyl-D-glucose	Phenolic acids	Phenolic acids	-
1-O-Vanilloyl-D-Glucose	Phenolic acids	Phenolic acids	-
2-(Formylamino)benzoic acid	Phenolic acids	Phenolic acids	3342-77-6
2,4-Dinitrophenol	Phenolic acids	Phenolic acids	51-28-5
2,5-Dihydroxybenzaldehyde	Phenolic acids	Phenolic acids	1194-98-5
2,6-Dihydroxybenzoic acid	Phenolic acids	Phenolic acids	303-07-1
2,6-Di-tert-butylphenol	Phenolic acids	Phenolic acids	128-39-2
2-Amino-3-methoxybenzoic acid	Phenolic acids	Phenolic acids	3177-80-8
2-Feruloyl-sn-glycerol	Phenolic acids	Phenolic acids	-
2-Hydroxybenzaldehyde (Salicylaldehyde)	Phenolic acids	Phenolic acids	90-02-8
2-Phenylethanol	Phenolic acids	Phenolic acids	60-12-8
3-(4-Hydroxyphenyl)-propionic acid	Phenolic acids	Phenolic acids	501-97-3
3,4,5-Trimethoxyphenyl-1-O-Glucoside	Phenolic acids	Phenolic acids	-
3,4-Dihydroxybenzeneacetic acid	Phenolic acids	Phenolic acids	102-32-9
3,4-Dihydroxybenzoic acid (Protocatechuic acid)	Phenolic acids	Phenolic acids	99-50-3
3,4-Dimethoxycinnamic acid	Phenolic acids	Phenolic acids	14737-89-4
3,5-Dicaffeoylquinic acid	Phenolic acids	Phenolic acids	-
3,5-Digalloylshikimic acid	Phenolic acids	Phenolic acids	95753-52-9
3-Hydroxycinnamic Acid	Phenolic acids	Phenolic acids	14755-02-3
3-O-Feruloylquinic acid	Phenolic acids	Phenolic acids	1899-29-2
3-O-Feruloylquinic acid-O-glucoside	Phenolic acids	Phenolic acids	-
3-O-p-Coumaroylquinic acid	Phenolic acids	Phenolic acids	87099-71-6
3-O-p-Coumaroylquinic acid-O-glucoside	Phenolic acids	Phenolic acids	-
3-O-p-Coumaroylshikimic acid	Phenolic acids	Phenolic acids	-
4-Aminobenzoic acid	Phenolic acids	Phenolic acids	150-13-0
4'-Hydroxy-3'-methoxyacetophenone (Acetovanillone)	Phenolic acids	Phenolic acids	498-02-2
4-Hydroxy-3-methoxymandelate	Phenolic acids	Phenolic acids	55-10-7
4-Hydroxybenzaldehyde	Phenolic acids	Phenolic acids	123-08-0
4-Hydroxybenzoic acid	Phenolic acids	Phenolic acids	99-96-7
4-MethoxycinnaMaldehyde	Phenolic acids	Phenolic acids	1963-36-6
4-Methoxycinnamic acid	Phenolic acids	Phenolic acids	830-09-1
4-Nitrocatechol	Phenolic acids	Phenolic acids	3316-09-4
4-O-Glucosyl-4-hydroxybenzoic acid	Phenolic acids	Phenolic acids	-
4-O-Glucosyl-sinapate	Phenolic acids	Phenolic acids	-
4-O-Sinapoylquinic acid	Phenolic acids	Phenolic acids	-
5'-Glucosyloxyjasmanic acid	Phenolic acids	Phenolic acids	-
5-O-Caffeoylshikimic acid	Phenolic acids	Phenolic acids	180981-12-8
5-O-Feruloyl quinic acid glucoside	Phenolic acids	Phenolic acids	-
5-O-Feruloylquinic acid	Phenolic acids	Phenolic acids	-
5-O-p-Coumaroylquinic acid O-glucoside	Phenolic acids	Phenolic acids	-
5-O-p-Coumaroylshikimic acid O-glucoside	Phenolic acids	Phenolic acids	-
6-O-Caffeoylarbutin	Phenolic acids	Phenolic acids	136172-60-6
6-O-Caffeoyl-D-glucose	Phenolic acids	Phenolic acids	-
6-O-Feruloyl-D-glucose	Phenolic acids	Phenolic acids	137887-25-3
6'-O-Feruloyl-D-sucrose	Phenolic acids	Phenolic acids	118230-77-6
Arbutin	Phenolic acids	Phenolic acids	497-76-7
Benzamide	Phenolic acids	Phenolic acids	55-21-0
Benzoic acid	Phenolic acids	Phenolic acids	65-85-0
Benzoylmalic acid	Phenolic acids	Phenolic acids	22138-51-8
Caffeic acid	Phenolic acids	Phenolic acids	331-39-5
Caffeic aldehyde	Phenolic acids	Phenolic acids	141632-15-7
Chlorogenic acid (3-O-Caffeoylquinic acid)	Phenolic acids	Phenolic acids	327-97-9
Chlorogenic acid methyl ester	Phenolic acids	Phenolic acids	29708-87-0
Cinnamic acid	Phenolic acids	Phenolic acids	140-10-3
Coniferaldehyde	Phenolic acids	Phenolic acids	20649-42-7
Coniferin	Phenolic acids	Phenolic acids	531-29-3
Coniferyl alcohol	Phenolic acids	Phenolic acids	458-35-5
Dibutyl phthalate	Phenolic acids	Phenolic acids	84-74-2
Dihydrocaffeic acid	Phenolic acids	Phenolic acids	1078-61-1
Dihydrocaffeoylglucose	Phenolic acids	Phenolic acids	-
Di-O-Glucosylquinic acid	Phenolic acids	Phenolic acids	-
Disinapoyl glucoside	Phenolic acids	Phenolic acids	-
Ferulic acid	Phenolic acids	Phenolic acids	537-98-4
Ferulic acid-4-O-glucoside	Phenolic acids	Phenolic acids	117405-51-3
Feruloyl syringic acid	Phenolic acids	Phenolic acids	-
Feruloylmalic acid	Phenolic acids	Phenolic acids	-
Furanofructosyl-α-D-(6-mustard acyl)glucoside	Phenolic acids	Phenolic acids	-
Gallacetophenone	Phenolic acids	Phenolic acids	528-21-2
Glucosyringic Acid	Phenolic acids	Phenolic acids	-
Homogentisic acid	Phenolic acids	Phenolic acids	451-13-8
Isochlorogenic acid A	Phenolic acids	Phenolic acids	2450-53-5
Isochlorogenic acid B	Phenolic acids	Phenolic acids	14534-61-3
Isochlorogenic acid C	Phenolic acids	Phenolic acids	57378-72-0
Maleoyl-caffeoylquinic acid	Phenolic acids	Phenolic acids	-
Methyl ferulate	Phenolic acids	Phenolic acids	2309-07-1
Methyl sinapate	Phenolic acids	Phenolic acids	20733-94-2
Neochlorogenic acid (5-O-Caffeoylquinic acid)	Phenolic acids	Phenolic acids	906-33-2
p-Coumaraldehyde	Phenolic acids	Phenolic acids	2538-87-6
p-Coumaric acid	Phenolic acids	Phenolic acids	501-98-4
p-Coumaric acid methyl ester	Phenolic acids	Phenolic acids	3943-97-3
p-Coumaric acid-4-O-glucoside	Phenolic acids	Phenolic acids	117405-48-8
p-Coumaryl alcohol	Phenolic acids	Phenolic acids	3690-05-9
Phenethyl caffeate	Phenolic acids	Phenolic acids	104594-70-9
Phthalic anhydride	Phenolic acids	Phenolic acids	85-44-9
p-Hydroxyphenyl acetic acid	Phenolic acids	Phenolic acids	156-38-7
Protocatechualdehyde	Phenolic acids	Phenolic acids	139-85-5
Protocatechuic acid-4-O-glucoside	Phenolic acids	Phenolic acids	-
Quinacyl syringic acid	Phenolic acids	Phenolic acids	-
Salicylic acid	Phenolic acids	Phenolic acids	69-72-7
Salicylic acid-2-O-glucoside	Phenolic acids	Phenolic acids	10366-91-3
Sinapaldehyde-4-O-Glucoside	Phenolic acids	Phenolic acids	154461-65-1
Sinapic acid	Phenolic acids	Phenolic acids	530-59-6
Sinapinaldehyde	Phenolic acids	Phenolic acids	4206-58-0
Sinapoyl malate	Phenolic acids	Phenolic acids	92344-58-6
Sinapoylglucuronic acid	Phenolic acids	Phenolic acids	-
Sinapyl alcohol	Phenolic acids	Phenolic acids	537-33-7
Syringaldehyde; 4-Hydroxy-3,5-Dimethoxybenzaldehyde	Phenolic acids	Phenolic acids	134-96-3
Syringaldehyde-4-O-glucoside	Phenolic acids	Phenolic acids	-
Syringic acid	Phenolic acids	Phenolic acids	530-57-4
Terephthalic acid	Phenolic acids	Phenolic acids	100-21-0
Trans-5-O-(p-Coumaroyl)shikimate	Phenolic acids	Phenolic acids	-
Trihydroxycinnamoylquinic acid	Phenolic acids	Phenolic acids	-
Vanillic acid	Phenolic acids	Phenolic acids	121-34-6
Vanillin	Phenolic acids	Phenolic acids	121-33-5
2,6-Dimethoxy-1,4-benzoquinone	Quinones	Quinones	530-55-2
3-Methoxy-juglone	Quinones	Quinones	-
(EC→EC)g(1)	Tannins	Proanthocyanidins	-
1-O-Galloyl-D-glucose	Tannins	Tannin	58511-73-2
1-O-Galloyl-rhamnose	Tannins	Tannin	-
3-O-Methylgallic Acid	Tannins	Tannin	3934-84-7
5-O-Galloyl-D-hamamelose	Tannins	Tannin	-
6-O-Galloyl-D-glucose	Tannins	Tannin	13186-19-1
Gallic acid-4-O-(6'''-feruloyl)sophoroside	Tannins	Tannin	-
24,30-Dihydroxy-12(13)-enolupinol	Terpenoids	Triterpene	-
2-Hydroxyoleanolic acid	Terpenoids	Triterpene	26707-60-8
3,24-Dihydroxy-17,21-semiacetal-12(13)oleanolic fruit	Terpenoids	Triterpene	-
3-O-(2-O-Acetyl-glucosyl)oleanolic acid	Terpenoids	Triterpene	-
Betulinic acid	Terpenoids	Triterpene	472-15-1
Maslinic acid	Terpenoids	Triterpene	4373-41-5
Ursolic acid	Terpenoids	Triterpene	77-52-1
