# Supplementary material for: Salinity Tolerance in a Synthetic Allotetraploid Wheat (SlSlAA) Is Similar to Its Higher Tolerant Parent Aegilops longissima (SlSl) and Linked to Flavonoids Metabolism
Source: Front Plant Sci. 2022 Mar 17;13:835498. doi: 10.3389/fpls.2022.835498 (PMC8968947; doi:10.3389/fpls.2022.835498)
Supplement: Supplementary Table 2 — Number of detected metabolites in each wheat line and each organ. CL, control leaf; SL, stress leaf; CR, control root; SR, stress root. [file Table_2.XLSX]

## Sheet: Sheet1
Class of metabolites	AA				SlSl				4x
	CL	SL	CR	SR	CL	SL	CR	SR	CL	SL	CR	SR
Flavonoids	190	188	145	122	196	199	136	138	205	206	127	130
Phenolic acids	115	113	107	105	112	113	100	104	117	117	106	107
Amino acids and derivatives	87	87	82	83	86	86	83	85	87	87	81	84
Organic acids	79	78	83	80	78	81	82	83	79	81	81	82
Alkaloids	63	63	67	68	68	70	67	69	71	72	69	69
Saccharides and Alcohols	46	48	49	49	46	46	49	49	46	46	49	49
Lignans and Coumarins	32	32	30	27	33	33	31	31	33	33	32	32
Free fatty acids	63	63	68	66	62	63	68	67	62	64	67	67
Nucleotides and derivatives	51	50	51	50	49	49	52	51	48	50	52	51
Terpenoids	6	6	3	6	7	7	6	6	6	7	4	4
Vitamin	13	13	13	12	13	13	12	14	13	13	13	13
Others	85	88	96	96	85	85	93	96	85	90	96	97
Total	830	829	794	764	835	845	779	793	852	866	777	785
