# Supplementary material for: Salinity Tolerance in a Synthetic Allotetraploid Wheat (SlSlAA) Is Similar to Its Higher Tolerant Parent Aegilops longissima (SlSl) and Linked to Flavonoids Metabolism
Source: Front Plant Sci. 2022 Mar 17;13:835498. doi: 10.3389/fpls.2022.835498 (PMC8968947; doi:10.3389/fpls.2022.835498)
Supplement: Supplementary Table 3 — Relative concentration of the metabolites that were not detected in all AA plant samples. CL, control leaf; SL, stress leaf; CR, control root; SR, stress root. [file Table_3.XLSX]

## Sheet: Sheet1
Compounds	Class	AA				SlSl				4x
		CL	SL	CR	SR	CL	SL	CR	SR	CL	SL	CR	SR
3-(2-(Methylamino)ethyl)-1H-indol-5-ol	Alkaloids	0	0	0	0	136557	134539	1147500	294170	1.52327e+06	136863	1.02079e+06	205723
3-O-Methylquercetin	Flavonoids	0	0	0	0	0	0	65784.7	8924.1	0	0	49071	20773.3
Chrysoeriol-7-O-(6''-sinapoyl)glucoside	Flavonoids	0	0	0	0	3889.7	15330	0	0	47240.3	12896.2	0	0
Isoorientin-7-O-(6''-p-coumaroyl)glucoside	Flavonoids	0	0	0	0	1.81717e+06	2.05723e+06	2014.5	0	372120	101026	6336.9	929.3
Isovitexin-2''-O-(6'''-feruloyl)glucoside	Flavonoids	0	0	0	0	1031170	1.02666e+06	0	18289.7	168630	64427.3	0	0
Isovitexin-2''-O-(6'''-p-coumaroyl)glucoside	Flavonoids	0	0	0	0	524297	265877	6211.8	26524.7	346830	121363	0	0
Luteolin-7-O-(6''-sinapoyl)glucoside	Flavonoids	0	0	0	0	0	18295	0	0	83664.3	40461.7	0	0
Orientin-7-O-arabinoside	Flavonoids	0	0	0	0	1.35737e+06	3.26787e+06	0	0	1.30673e+06	1377400	0	0
Tricin-5-O-guaiacylglycerol	Flavonoids	0	0	0	0	5.82687e+06	4190800	34998.3	8560.9	11161.1	19830.3	0	0
Vanillyl-O-Vitexin	Flavonoids	0	0	0	0	432977	284713	6251.4	13205.2	104888	112270	0	0
Vitexin-7-O-(6''-p-coumaroyl)glucoside	Flavonoids	0	0	0	0	1.38643e+06	500137	14749.3	35681	704940	240077	0	0
Coumarin O-rutinoside	Lignans and Coumarins	0	0	0	0	2825.4	13951.2	18739	111284	25280.7	11990.6	7458.6	51824.7
Isoscopoletin (6-Hydroxy-7-Methoxycoumarin)	Lignans and Coumarins	0	0	0	0	71222	20406.7	136567	59841	20225	6381.7	116077	0
2-Methyl-3-oxoadipic acid	Organic acids	0	0	0	0	100697	96260.3	0	0	47432.3	39589.3	0	0
