# Supplementary material for: Salinity Tolerance in a Synthetic Allotetraploid Wheat (SlSlAA) Is Similar to Its Higher Tolerant Parent Aegilops longissima (SlSl) and Linked to Flavonoids Metabolism
Source: Front Plant Sci. 2022 Mar 17;13:835498. doi: 10.3389/fpls.2022.835498 (PMC8968947; doi:10.3389/fpls.2022.835498)
Supplement: Supplementary Table 4 — Information of all transgressively accumulated metabolites in leaves of a synthetic tetraploid wheat line under control condition. Transgressive up accumulation: concentration of metabolite in 4x was higher than that of either of its parents (4x/AA > 2 VIP > 1 and 4x/SlSl > 2 VIP > 1); transgressive down accumulation: concentration of metabolite in 4x was lower than that of either of its parents (4x/AA < 0.5 VIP > 1 and 4x/SlSl < 0.5 VIP > 1). [file Table_4.XLSX]

## Sheet: Transgressive up
Compounds	Class I	Class II	CAS
Caffeoylcholine-4-O-glucoside	Alkaloids	Alkaloids	-
N-Methyltryptamine	Alkaloids	Alkaloids	61-49-4
N-Acetylputrescine	Alkaloids	Phenolamine	18233-70-0
N-Feruloylagmatine	Alkaloids	Phenolamine	-
N-Feruloylhydroxyputrescine	Alkaloids	Phenolamine	-
N-p-Coumaroylhydroxyputrescine	Alkaloids	Phenolamine	-
Sinapoylagmatine	Alkaloids	Phenolamine	-
Sinapoylputrescine	Alkaloids	Phenolamine	70185-57-8
3-(2-(Methylamino)ethyl)-1H-indol-5-ol	Alkaloids	Plumerane	1134-01-6
L-Homocysteine	Amino acids and derivatives	Amino acids and derivatives	6027-13-0
N-Acetyl-L-phenylalanine	Amino acids and derivatives	Amino acids and derivatives	2018-61-3
N-Acetyl-L-Tryptophan	Amino acids and derivatives	Amino acids and derivatives	1218-34-4
Eriodictyol-3'-O-glucoside	Flavonoids	Dihydroflavone	-
Naringenin-7-O-glucoside (Prunin)	Flavonoids	Dihydroflavone	529-55-5
Chrysoeriol-7-O-(6''-malonyl)glucoside	Flavonoids	Flavones	-
Chrysoeriol-7-O-(6''-sinapoyl)glucoside	Flavonoids	Flavones	-
Diosmetin-7-O-(6''-malonyl)glucoside	Flavonoids	Flavones	-
Hesperetin-7-O-glucoside	Flavonoids	Flavones	31712-49-9
Luteolin-7-O-(6''-sinapoyl)glucoside	Flavonoids	Flavones	-
Tricin-4'-O-(syringyl alcohol)ether-7-O-glucoside	Flavonoids	Flavones	-
Isosaponarin(Isovitexin-4'-O-glucoside)	Flavonoids	Flavonoid carbonoside	19416-87-6
Vitexin-7-O-(6''-feruloyl)glucoside	Flavonoids	Flavonoid carbonoside	-
Dihydrokaempferol-7-O-glucoside	Flavonoids	Flavonols	-
Kaempferol-3-O-(6''-malonyl)galactoside	Flavonoids	Flavonols	-
Coumarin O-rutinoside	Lignans and Coumarins	Coumarins	-
Scopoletin-7-O-glucuronide	Lignans and Coumarins	Coumarins	132752-65-9
3-Hydroxybenzoic Acid	Organic acids	Organic acids	99-06-9
D-Fructose-1,6-biphosphate	Others	Saccharides and Alcohols	488-69-7
D-Lactulose	Others	Saccharides and Alcohols	4618-18-2
D-Maltose	Others	Saccharides and Alcohols	133-99-3
D-Sucrose	Others	Saccharides and Alcohols	57-50-1
D-Trehalose	Others	Saccharides and Alcohols	99-20-7
Galactinol	Others	Saccharides and Alcohols	3687-64-7
Isomaltulose	Others	Saccharides and Alcohols	13718-94-0
Lactobiose	Others	Saccharides and Alcohols	63-42-3
Melibiose	Others	Saccharides and Alcohols	585-99-9
Raffinose	Others	Saccharides and Alcohols	512-69-6
Stachyose	Others	Saccharides and Alcohols	470-55-3
Dehydroascorbic acid	Others	Vitamin	490-83-5
1-O-[(E)-Caffeoyl]-D-glucose	Phenolic acids	Phenolic acids	-
1-O-Feruloylquinic acid	Phenolic acids	Phenolic acids	-
1-O-Gentisoyl-D-glucoside	Phenolic acids	Phenolic acids	23445-11-6
1-O-Salicyl-D-glucose	Phenolic acids	Phenolic acids	60517-74-0
3,4-Dimethoxycinnamic acid	Phenolic acids	Phenolic acids	14737-89-4
3-O-Feruloylquinic acid	Phenolic acids	Phenolic acids	1899-29-2
3-O-p-Coumaroylshikimic acid	Phenolic acids	Phenolic acids	-
4-O-Sinapoylquinic acid	Phenolic acids	Phenolic acids	-
5-O-Caffeoylshikimic acid	Phenolic acids	Phenolic acids	180981-12-8
5-O-Feruloylquinic acid	Phenolic acids	Phenolic acids	-
6-O-Caffeoyl-D-glucose	Phenolic acids	Phenolic acids	-
Cinnamic acid	Phenolic acids	Phenolic acids	140-10-3
Coniferin	Phenolic acids	Phenolic acids	531-29-3
Disinapoyl glucoside	Phenolic acids	Phenolic acids	-
Glucosyringic Acid	Phenolic acids	Phenolic acids	-
Methyl sinapate	Phenolic acids	Phenolic acids	20733-94-2
Protocatechuic acid-4-O-glucoside	Phenolic acids	Phenolic acids	-
Sinapoylglucuronic acid	Phenolic acids	Phenolic acids	-
Trans-5-O-(p-Coumaroyl)shikimate	Phenolic acids	Phenolic acids	-
1-O-Galloyl-D-glucose	Tannins	Tannin	58511-73-2

## Sheet: Transgressive down
Compounds	Class I	Class II	CAS
Eupatilin-7-O-glucoside	Flavonoids	Flavones	-
Tricin-5-O-Glucoside	Flavonoids	Flavones	32769-00-9
Quercetin-3',4'-dimethyl ether	Flavonoids	Flavonols	3306-29-4
1-Hydroxypineolin Diglucoside	Lignans and Coumarins	Lignans	-
2-(Dimethylamino)guanosine	Nucleotides and derivatives	Nucleotides and derivatives	2140-67-2
5-Methyluridine	Nucleotides and derivatives	Nucleotides and derivatives	1463-10-1
Uridine 5'-monophosphate	Nucleotides and derivatives	Nucleotides and derivatives	58-97-9
(-)-Jasmonoyl-L-Isoleucine	Organic acids	Organic acids	120330-93-0
Feruloyl syringic acid	Phenolic acids	Phenolic acids	-
