# Supplementary material for: Salinity Tolerance in a Synthetic Allotetraploid Wheat (SlSlAA) Is Similar to Its Higher Tolerant Parent Aegilops longissima (SlSl) and Linked to Flavonoids Metabolism
Source: Front Plant Sci. 2022 Mar 17;13:835498. doi: 10.3389/fpls.2022.835498 (PMC8968947; doi:10.3389/fpls.2022.835498)
Supplement: Supplementary Table 6 — Information of all transgressively accumulated metabolites in roots of a synthetic tetraploid wheat line under control condition. [file Table_6.XLSX]

## Sheet: Transgressive up
Compounds	Class I	Class II	CAS
HBOA-2-O-glucoside	Alkaloids	Alkaloids	27625-86-1
N-Feruloylhydroxyputrescine	Alkaloids	Phenolamine	-
Saponarin-4'-O-glucoside	Flavonoids	Flavones	-
Nicotinic acid adenine dinucleotide	Nucleotides and derivatives	Nucleotides and derivatives	53-84-9
(-)-Jasmonoyl-L-Isoleucine	Organic acids	Organic acids	120330-93-0
3-Hydroxybenzoic Acid	Organic acids	Organic acids	99-06-9
D-Arabitol	Others	Saccharides and Alcohols	488-82-4
D-Fructose-1,6-biphosphate	Others	Saccharides and Alcohols	488-69-7
Ribitol	Others	Saccharides and Alcohols	488-81-3
1,3-O-Di-p-Coumaroylglycerol	Phenolic acids	Phenolic acids	-
1-O-Feruloyl-3-O-p-Coumaroylglycerol	Phenolic acids	Phenolic acids	-
1-O-Gentisoyl-D-glucoside	Phenolic acids	Phenolic acids	23445-11-6
2,6-Dihydroxybenzoic acid	Phenolic acids	Phenolic acids	303-07-1
4-O-Sinapoylquinic acid	Phenolic acids	Phenolic acids	-
5-O-Feruloylquinic acid	Phenolic acids	Phenolic acids	-
Protocatechuic acid-4-O-glucoside	Phenolic acids	Phenolic acids	-

## Sheet: Transgressive down
Compounds	Class I	Class II	CAS
Phenethylamine	Alkaloids	Alkaloids	64-04-0
Acetryptine	Alkaloids	Phenolamine	3551-18-6
N-Feruloylserotonin	Alkaloids	Phenolamine	68573-23-9
p-Coumaroylferuloylcadaverine	Alkaloids	Phenolamine	-
Tryptamine	Alkaloids	Plumerane	61-54-1
L-Valyl-L-Phenylalanine	Amino acids and derivatives	Amino acids and derivatives	3918-92-1
4',5,7-Trihydroxy-3',6-dimethoxyflavone (Jaceosidin)	Flavonoids	Flavones	18085-97-7
Diosmetin-7-O-rutinoside (Diosmin)	Flavonoids	Flavones	520-27-4
Luteolin-7-O-glucuronide	Flavonoids	Flavones	29741-10-4
Scutellarein-7-O-glucuronide (Scutellarin)	Flavonoids	Flavones	27740-01-8
Tetahydroxyflavone-7-O-glucuronide	Flavonoids	Flavones	-
Tricin (5,7,4'-Trihydroxy-3',5'-dimethoxyflavone)	Flavonoids	Flavones	520-32-1
Tricin-7-O-neohesperidoside	Flavonoids	Flavones	53766-40-8
Tricin-7-O-rutinoside	Flavonoids	Flavones	-
Kaempferol-3-O-glucuronide	Flavonoids	Flavonols	22688-78-4
Isohydroxymatairesinol	Lignans and Coumarins	Lignans	-
11,14,17-Eicosatrienoic acid	Lipids	Free fatty acids	17046-59-2
4-Oxo-9Z,11Z,13E,15E-Octadecatetraenoic Acid	Lipids	Free fatty acids	-
9-Hydroxy-13-oxo-10-octadecenoic Acid	Lipids	Free fatty acids	-
9S-Hydroperoxy-10E,12Z-octadecadienoic acid	Lipids	Free fatty acids	5502-91-0
Dihomo-gamma-linolenic acid; (8Z,11Z,14Z)-Icosatrienoic acid	Lipids	Free fatty acids	1783-84-2
Myristoleic acid	Lipids	Free fatty acids	544-64-9
LysoPC 14:0	Lipids	LPC	20559-16-4
LysoPC 16:0	Lipids	LPC	17364-16-8
LysoPC 16:0(2n isomer)	Lipids	LPC	-
LysoPC 16:1	Lipids	LPC	76790-27-7
LysoPC 18:0	Lipids	LPC	19420-57-6
LysoPC 18:0(2n isomer)	Lipids	LPC	-
LysoPC 19:0	Lipids	LPC	108273-88-7
LysoPC 19:1	Lipids	LPC	-
LysoPC 19:2	Lipids	LPC	-
LysoPC 20:2	Lipids	LPC	-
LysoPC 20:3	Lipids	LPC	1199257-41-4
LysoPC 20:4	Lipids	LPC	-
LysoPC 20:5	Lipids	LPC	162440-04-2
LysoPE 16:0	Lipids	LPE	53862-35-4
LysoPE 16:0(2n isomer)	Lipids	LPE	-
LysoPE 18:1	Lipids	LPE	89576-29-4
LysoPE 20:3	Lipids	LPE	-
LysoPE 20:4	Lipids	LPE	-
LysoPE 20:5	Lipids	LPE	-
9-(Arabinosyl)hypoxanthine	Nucleotides and derivatives	Nucleotides and derivatives	7013-16-3
Guanosine 3',5'-cyclic monophosphate	Nucleotides and derivatives	Nucleotides and derivatives	7665-99-8
Argininosuccinic acid	Organic acids	Organic acids	2387-71-5
D-Fructose	Others	Saccharides and Alcohols	7660-25-5
D-Glucosamine 1-phosphate	Others	Saccharides and Alcohols	2152-75-2
3-O-p-Coumaroylquinic acid	Phenolic acids	Phenolic acids	87099-71-6
3-O-p-Coumaroylshikimic acid	Phenolic acids	Phenolic acids	-
Benzamide	Phenolic acids	Phenolic acids	55-21-0
Trans-5-O-(p-Coumaroyl)shikimate	Phenolic acids	Phenolic acids	-
Gallic acid-4-O-(6'''-feruloyl)sophoroside	Tannins	Tannin	-
