# Supplementary material for: Salinity Tolerance in a Synthetic Allotetraploid Wheat (SlSlAA) Is Similar to Its Higher Tolerant Parent Aegilops longissima (SlSl) and Linked to Flavonoids Metabolism
Source: Front Plant Sci. 2022 Mar 17;13:835498. doi: 10.3389/fpls.2022.835498 (PMC8968947; doi:10.3389/fpls.2022.835498)
Supplement: Supplementary Table 7 — Information of all transgressively accumulated metabolites in roots of a synthetic tetraploid wheat line under salinity condition. [file Table_7.XLSX]

## Sheet: Transgressive up
Compounds	Class I	Class II	CAS
N-Feruloyl-Cadaverine	Alkaloids	Phenolamine	-
N-Feruloylhydroxyputrescine	Alkaloids	Phenolamine	-
N-p-Coumaroylhydroxyputrescine	Alkaloids	Phenolamine	-
Eriodictyol-7-O-glucoside	Flavonoids	Dihydroflavone	38965-51-4
Dihydrokaempferol-3-O-glucoside	Flavonoids	Dihydroflavonol	1049-08-8
Hesperetin-5,7-di-O-glucoside	Flavonoids	Dihydroflavonol	-
Chrysoeriol-7-O-(6''-malonyl)glucoside	Flavonoids	Flavones	-
Chrysoeriol-7-O-rutinoside	Flavonoids	Flavones	-
Diosmetin-7-O-(6''-malonyl)glucoside	Flavonoids	Flavones	-
Diosmetin-7-O-Neohesperidoside (Neodiosmin)	Flavonoids	Flavones	38665-01-9
Hispidulin-7-O-(6''-O-p-Coumaroyl)Glucoside	Flavonoids	Flavones	-
Luteolin-7-O-neohesperidoside (Lonicerin)	Flavonoids	Flavones	25694-72-8
Tricin-4'-O-(syringyl alcohol)ether-7-O-glucoside	Flavonoids	Flavones	-
3-O-Methylquercetin	Flavonoids	Flavonols	1486-70-0
Kaempferol-3-O-robinobioside(Biorobin)	Flavonoids	Flavonols	17297-56-2
O-Feruloyl 3-hydroxycoumarin	Lignans and Coumarins	Coumarins	-
Syringaresinol	Lignans and Coumarins	Lignans	21453-69-0
2'-Deoxyadenosine	Nucleotides and derivatives	Nucleotides and derivatives	958-09-8
Cordycepin (3'-Deoxyadenosine)	Nucleotides and derivatives	Nucleotides and derivatives	73-03-0
1,2-O-Diferuloylglycerol	Phenolic acids	Phenolic acids	-
1,3-O-Diferuloylglycerol	Phenolic acids	Phenolic acids	83008-46-2
1-O-Gentisoyl-D-glucoside	Phenolic acids	Phenolic acids	23445-11-6
4-O-Sinapoylquinic acid	Phenolic acids	Phenolic acids	-
5-O-p-Coumaroylshikimic acid O-glucoside	Phenolic acids	Phenolic acids	-
Protocatechuic acid-4-O-glucoside	Phenolic acids	Phenolic acids	-

## Sheet: Transgressive down
Compounds	Class I	Class II	CAS
Ergotamine	Alkaloids	Alkaloids	113-15-5
Nicotinic Acid Methyl Ester(Methyl Nicotinate)	Alkaloids	Alkaloids	93-60-7
Tryptamine	Alkaloids	Plumerane	61-54-1
2,6-Diaminooimelic acid	Amino acids and derivatives	Amino acids and derivatives	583-93-7
5-Hydroxy-L-tryptophan	Amino acids and derivatives	Amino acids and derivatives	56-69-9
5-Oxo-L-Proline	Amino acids and derivatives	Amino acids and derivatives	98-79-3
N-Acetyl-L-Arginine	Amino acids and derivatives	Amino acids and derivatives	155-84-0
Apigenin-8-C-Glucoside (Vitexin)	Flavonoids	Flavonoid carbonoside	3681-93-4
Cis-5,8,11,14,17-Eicosapentaenoic Acid	Lipids	Free fatty acids	10417-94-4
Myristoleic acid	Lipids	Free fatty acids	544-64-9
LysoPI 16:0	Lipids	Glycerol ester	-
LysoPC 16:1	Lipids	LPC	76790-27-7
LysoPC 16:4	Lipids	LPC	-
LysoPC 18:0(2n isomer)	Lipids	LPC	-
LysoPC 18:1	Lipids	LPC	-
LysoPC 18:1(2n isomer)	Lipids	LPC	-
LysoPC 19:1	Lipids	LPC	-
LysoPC 20:0	Lipids	LPC	108341-80-6
LysoPC 20:1	Lipids	LPC	-
LysoPC 20:5	Lipids	LPC	162440-04-2
LysoPC 22:5	Lipids	LPC	-
LysoPC 22:5(2n isomer)	Lipids	LPC	-
LysoPE 14:0	Lipids	LPE	-
LysoPE 16:3	Lipids	LPE	-
LysoPE 17:0	Lipids	LPE	-
LysoPE 17:1	Lipids	LPE	-
LysoPE 18:1	Lipids	LPE	89576-29-4
LysoPE 20:5	Lipids	LPE	-
Uric acid	Nucleotides and derivatives	Nucleotides and derivatives	69-93-2
D(+)-Melezitose O-rhamnoside	Others	Saccharides and Alcohols	-
D-Melezitose	Others	Saccharides and Alcohols	597-12-6
Galactinol	Others	Saccharides and Alcohols	3687-64-7
Gluconic acid	Others	Saccharides and Alcohols	526-95-4
1-O-p-Coumaroylquinic acid	Phenolic acids	Phenolic acids	-
3-O-p-Coumaroylquinic acid	Phenolic acids	Phenolic acids	87099-71-6
3-O-p-Coumaroylshikimic acid	Phenolic acids	Phenolic acids	-
4-Methoxycinnamic acid	Phenolic acids	Phenolic acids	830-09-1
6-O-Feruloyl-D-glucose	Phenolic acids	Phenolic acids	137887-25-3
Cinnamic acid	Phenolic acids	Phenolic acids	140-10-3
p-Coumaric acid methyl ester	Phenolic acids	Phenolic acids	3943-97-3
Trans-5-O-(p-Coumaroyl)shikimate	Phenolic acids	Phenolic acids	-
