# Supplementary material for: Salinity Tolerance in a Synthetic Allotetraploid Wheat (SlSlAA) Is Similar to Its Higher Tolerant Parent Aegilops longissima (SlSl) and Linked to Flavonoids Metabolism
Source: Front Plant Sci. 2022 Mar 17;13:835498. doi: 10.3389/fpls.2022.835498 (PMC8968947; doi:10.3389/fpls.2022.835498)
Supplement: Supplementary Table 8 — Fold changes (stress/control) of differentially accumulated metabolites in leaves of a synthetic tetraploid wheat line and its parents. [file Table_8.XLSX]

## Sheet: AA leaf
Compounds	Class I	Class II	CAS	VIP	Fold_Change
Cis-N-Feruloyltyramine	Alkaloids	Alkaloids	80510-09-4	1.31813	4.7675
DIMBOA glucoside	Alkaloids	Alkaloids	18607-79-9	1.35889	2.15203
DL-2-Aminoadipic acid	Alkaloids	Alkaloids	542-32-5	1.27851	2.29879
Cadaverine	Alkaloids	Phenolamine	462-94-2	1.35839	4.28575
Diferuloylcadaverine	Alkaloids	Phenolamine	-	1.1226	3.92187
N,N'-Diferuloylputrescine	Alkaloids	Phenolamine	42369-86-8	1.02876	2.25882
N1,N8-Bis(sinapoyl)spermidine	Alkaloids	Phenolamine	-	1.07055	2.47556
N-Feruloyltyramine	Alkaloids	Phenolamine	66648-43-9	1.29467	4.97063
Putrescine	Alkaloids	Phenolamine	110-60-1	1.37763	137581
Indole-3-carboxylic acid	Alkaloids	Plumerane	771-50-6	1.27194	2.87455
Indole-5-carboxylic acid	Alkaloids	Plumerane	1670-81-1	1.28067	2.83661
1-Methylpiperidine-2-carboxylic acid	Amino acids and derivatives	Amino acids and derivatives	7730-87-2	1.36455	4.17999
5-Hydroxy-L-tryptophan	Amino acids and derivatives	Amino acids and derivatives	56-69-9	1.22938	2.18415
5-L-Glutamyl-L-amino acid	Amino acids and derivatives	Amino acids and derivatives	5875-41-2	1.28912	2.95979
D-Proline betaine	Amino acids and derivatives	Amino acids and derivatives	1195-94-4	1.36849	4.33768
Glutathione reduced form	Amino acids and derivatives	Amino acids and derivatives	70-18-8	1.35388	11.4847
L-Alanyl-L-Alanine	Amino acids and derivatives	Amino acids and derivatives	1948-31-8	1.13473	18.6251
L-Aspartic acid-O-diglucoside	Amino acids and derivatives	Amino acids and derivatives	-	1.32205	92.9916
L-Cysteine	Amino acids and derivatives	Amino acids and derivatives	52-90-4	1.37121	11.7627
L-Homocysteine	Amino acids and derivatives	Amino acids and derivatives	6027-13-0	1.22974	3.30083
L-Homocystine	Amino acids and derivatives	Amino acids and derivatives	626-72-2	1.28155	4.07396
L-Homomethionine	Amino acids and derivatives	Amino acids and derivatives	25148-30-5	1.34742	6.65414
L-Proline	Amino acids and derivatives	Amino acids and derivatives	147-85-3	1.37658	24.8823
L-Prolyl-L-Leucine	Amino acids and derivatives	Amino acids and derivatives	52899-07-7	1.34608	2.71315
L-Prolyl-L-Phenylalanine	Amino acids and derivatives	Amino acids and derivatives	13589-02-1	1.33573	12.5389
N-Acetyl-L-methionine	Amino acids and derivatives	Amino acids and derivatives	65-82-7	1.34264	2.13063
N-Acetyl-L-phenylalanine	Amino acids and derivatives	Amino acids and derivatives	2018-61-3	1.36953	17.654
N-Acetyl-L-Tryptophan	Amino acids and derivatives	Amino acids and derivatives	1218-34-4	1.3771	121.242
Nicotianamine	Amino acids and derivatives	Amino acids and derivatives	34441-14-0	1.19425	2.32378
N-α-Acetyl-L-ornithine	Amino acids and derivatives	Amino acids and derivatives	6205-08-9	1.34432	3.31938
Pipecolic acid	Amino acids and derivatives	Amino acids and derivatives	4043-87-2	1.2893	2.06282
3-O-Acetylpinobanksin	Flavonoids	Dihydroflavonol	52117-69-8	1.10647	2.1187
Dhurrin-6'-O-Glucoside	Flavonoids	Flavones	-	1.0251	5.31851
Tricin-4'-O-[β-guaiacyl-(9''-O-acetyl)glycerol]ether	Flavonoids	Flavones	-	1.18395	2.17637
Tricin-7-O-Glucuronide	Flavonoids	Flavones	-	1.36412	3.96433
Orientin-6-C-arabinoside	Flavonoids	Flavonoid carbonoside	-	1.37548	1033.61
5,7,4'-Trihydroxy-6,8-dimethoxyisoflavone-7-O-galactoside-rhamnose	Flavonoids	Isoflavones	-	1.33766	2.26235
4-Hydroxycoumarin	Lignans and Coumarins	Coumarins	1076-38-6	1.14516	2.20621
Scoparone	Lignans and Coumarins	Coumarins	120-08-1	1.37563	1047.56
9-Hydroxy-12-oxo-15(Z)-octadecenoic acid	Lipids	Free fatty acids	-	1.0282	2.66734
Myristoleic acid	Lipids	Free fatty acids	544-64-9	1.29	3.67816
LysoPC 20:0	Lipids	LPC	108341-80-6	1.34552	7.54086
Choline Alfoscerate	Lipids	PC	28319-77-9	1.3778	7414.59
2'-Deoxyuridine	Nucleotides and derivatives	Nucleotides and derivatives	951-78-0	1.34853	7.99877
Isopentenyladenine-7-N-glucoside	Nucleotides and derivatives	Nucleotides and derivatives	-	1.35527	67.8995
1-Aminocyclopropane-1-carboxylic acid	Organic acids	Organic acids	22059-21-8	1.04579	8.8957
2,2-Dimethylsuccinic acid	Organic acids	Organic acids	597-43-3	1.37154	6.64933
2-Isopropylmalic Acid	Organic acids	Organic acids	49601-06-1	1.36829	6.42959
2-Oxoadipic acid	Organic acids	Organic acids	3184-35-8	1.31031	3.65172
2-Propylmalic Acid	Organic acids	Organic acids	-	1.37505	7.49452
3-Isopropylmalic Acid	Organic acids	Organic acids	921-28-8	1.37108	7.30922
3-Ureidopropionic Acid	Organic acids	Organic acids	462-88-4	1.37625	7.26145
5-Acetamidopentanoic Acid	Organic acids	Organic acids	1072-10-2	1.33508	2.20328
Abscisic acid	Organic acids	Organic acids	21293-29-8	1.33751	2.50131
Benzoylformic acid	Organic acids	Organic acids	611-73-4	1.3377	6.19847
D-Erythronolactone	Organic acids	Organic acids	15667-21-7	1.37757	38.4521
Muconic acid	Organic acids	Organic acids	1119-72-8	1.36806	15.4968
Dehydrodiconiferyl alcohol-4-O-glucoside	Others	Others	107870-88-2	1.20503	2.21997
Pantetheine	Others	Others	496-65-1	1.35741	4.22966
3-Phospho-D-glyceric acid	Others	Saccharides and Alcohols	820-11-1	1.08647	5.56116
D-Arabinose	Others	Saccharides and Alcohols	10323-20-3	1.27194	2.8068
D-Glucosamine 1-phosphate	Others	Saccharides and Alcohols	2152-75-2	1.13261	2.37983
Dihydroxyacetone phosphate	Others	Saccharides and Alcohols	57-04-5	1.33889	7.71912
Galactinol	Others	Saccharides and Alcohols	3687-64-7	1.04437	2.99982
Ribitol	Others	Saccharides and Alcohols	488-81-3	1.37292	2572.33
Sorbitol-6-phosphate	Others	Saccharides and Alcohols	20479-58-7	1.2065	3.59849
Trehalose 6-phosphate	Others	Saccharides and Alcohols	4484-88-2	1.3674	3.90703
Turanose	Others	Saccharides and Alcohols	547-25-1	1.33695	71.1289
1,2-O-Diferuloylglycerol	Phenolic acids	Phenolic acids	-	1.32107	2.56077
1,3-O-Diferuloylglycerol	Phenolic acids	Phenolic acids	83008-46-2	1.32156	2.65526
1,3-O-Di-p-Coumaroylglycerol	Phenolic acids	Phenolic acids	-	1.37313	13513.4
1-Feruloyl-sn-glycerol	Phenolic acids	Phenolic acids	-	1.33436	2.74316
1-O-Feruloyl-3-O-p-Coumaroylglycerol	Phenolic acids	Phenolic acids	-	1.20077	112.336
1-O-Gentisoyl-D-glucoside	Phenolic acids	Phenolic acids	23445-11-6	1.25437	2.33509
1-O-Salicyl-D-glucose	Phenolic acids	Phenolic acids	60517-74-0	1.08143	2.13392
1-O-Vanilloyl-D-Glucose	Phenolic acids	Phenolic acids	-	1.35876	3.39073
2-Feruloyl-sn-glycerol	Phenolic acids	Phenolic acids	-	1.35299	2.9592
2-Phenylethanol	Phenolic acids	Phenolic acids	60-12-8	1.10494	2.01547
5-O-p-Coumaroylshikimic acid O-glucoside	Phenolic acids	Phenolic acids	-	1.35785	3.00528
Furanofructosyl-α-D-(6-mustard acyl)glucoside	Phenolic acids	Phenolic acids	-	1.28633	2.1717
Protocatechuic acid-4-O-glucoside	Phenolic acids	Phenolic acids	-	1.21146	2.17489
Sinapoyl malate	Phenolic acids	Phenolic acids	92344-58-6	1.01152	5.17456
Trigonelline	Alkaloids	Alkaloids	535-83-1	1.35128	0.368134
Acetryptine	Alkaloids	Phenolamine	3551-18-6	1.36839	0.147674
N-(4'-O-glycosyl)-feruloyl agmatine	Alkaloids	Phenolamine	-	1.34483	0.116435
N-(4'-O-glycosyl)-p-coumaroyl agmatine	Alkaloids	Phenolamine	-	1.32219	0.0290735
N-Feruloylagmatine	Alkaloids	Phenolamine	-	1.34347	0.130391
N-Feruloyl-Cadaverine	Alkaloids	Phenolamine	-	1.34477	0.176178
N-Feruloylputrescine	Alkaloids	Phenolamine	501-13-3	1.34849	0.272167
N-Feruloyltryptamine	Alkaloids	Phenolamine	53905-13-8	1.37504	0.045105
N-Glucosyl-p-coumaroylputrescine	Alkaloids	Phenolamine	-	1.18758	0.0302516
N-p-Coumaroylhydroxyputrescine	Alkaloids	Phenolamine	-	1.36358	0.163552
p-Coumaroylagmatine	Alkaloids	Phenolamine	7295-86-5	1.36412	0.0629007
p-Coumaroylcadaverine	Alkaloids	Phenolamine	-	1.37809	7.51775e-06
p-Coumaroylputrescine	Alkaloids	Phenolamine	34136-53-3	1.37157	0.0350247
Sinapoylagmatine	Alkaloids	Phenolamine	-	1.31499	0.27354
Sinapoylputrescine	Alkaloids	Phenolamine	70185-57-8	1.08933	0.391916
Indole	Alkaloids	Plumerane	120-72-9	1.34719	0.180677
Tryptamine	Alkaloids	Plumerane	61-54-1	1.36593	0.0735232
3,4-Dihydroxy-L-phenylalanine (L-Dopa)	Amino acids and derivatives	Amino acids and derivatives	59-92-7	1.26333	0.0935203
4-Hydroxy-L-glutamic acid	Amino acids and derivatives	Amino acids and derivatives	3913-68-6	1.30758	0.280583
L-Aspartic Acid	Amino acids and derivatives	Amino acids and derivatives	56-84-8	1.37474	0.377367
L-Glutamic acid	Amino acids and derivatives	Amino acids and derivatives	56-86-0	1.29935	0.468294
L-Glutamic acid-O-glycoside	Amino acids and derivatives	Amino acids and derivatives	-	1.13739	0.0485086
L-Glutamine-O-glycoside	Amino acids and derivatives	Amino acids and derivatives	-	1.1669	0.216165
L-threo-3-Methylaspartate	Amino acids and derivatives	Amino acids and derivatives	6061-13-8	1.33555	0.430594
N,N-Dimethylglycine	Amino acids and derivatives	Amino acids and derivatives	1118-68-9	1.18144	0.469188
N-Methylglycine	Amino acids and derivatives	Amino acids and derivatives	107-97-1	1.0342	0.158231
O-Acetylserine	Amino acids and derivatives	Amino acids and derivatives	5147-00-2	1.31558	0.484523
Chrysoeriol-6-C-glucoside (Isoscoparin)	Flavonoids	Flavones	20013-23-4	1.37038	0.42131
Apigenin-6-C-glucoside (Isovitexin)	Flavonoids	Flavonoid carbonoside	29702-25-8	1.35502	0.495361
Kaempferol-3-O-glucuronide	Flavonoids	Flavonols	22688-78-4	1.2545	0.497118
7-Methoxycoumarin	Lignans and Coumarins	Coumarins	531-59-9	1.37791	0.0006623
Coumarin	Lignans and Coumarins	Coumarins	91-64-5	1.35119	0.229218
Esculetin-7-O-glucoside	Lignans and Coumarins	Coumarins	-	1.03654	0.478598
Esculetin-7-O-quinic acid	Lignans and Coumarins	Coumarins	-	1.37748	0.357713
Esculin (6,7-DihydroxyCoumarin-6-glucoside)	Lignans and Coumarins	Coumarins	531-75-9	1.17948	0.444058
Scopoletin-7-O-glucuronide	Lignans and Coumarins	Coumarins	132752-65-9	1.37704	0.134145
(8'R,7'S)-(-)-8-Hydroxy-α-conidendrin	Lignans and Coumarins	Lignans	-	1.21955	0.255837
Pinoresinol-4-O-glucoside	Lignans and Coumarins	Lignans	41607-20-9	1.34225	0.347149
Syringaresinol	Lignans and Coumarins	Lignans	21453-69-0	1.29336	0.257772
13(S)-HODE;13(S)-Hydroxyoctadeca-9Z,11E-dienoic acid	Lipids	Free fatty acids	10219-69-9	1.24836	0.454538
5S,8R-DiHODE; (5S,8R,9Z,12Z)-5,8-Dihydroxyoctadeca-9,12-dienoate	Lipids	Free fatty acids	-	1.37098	0.365115
9,12,13-Trihydroxy-10,15-octadecadienoic acid	Lipids	Free fatty acids	-	1.23237	0.496059
9S-Hydroxy-10E,12Z-octadecadienoic acid	Lipids	Free fatty acids	15514-85-9	1.23371	0.458612
Methyl 7,10-hexadecadienoate	Lipids	Free fatty acids	-	1.31229	0.460949
LysoPC 14:0	Lipids	LPC	20559-16-4	1.27517	0.425842
LysoPC 16:0	Lipids	LPC	17364-16-8	1.33082	0.471344
LysoPC 16:0(2n isomer)	Lipids	LPC	-	1.18075	0.412707
LysoPC 16:2	Lipids	LPC	-	1.29037	0.386545
LysoPC 18:0(2n isomer)	Lipids	LPC	-	1.31506	0.478177
LysoPC 20:2	Lipids	LPC	-	1.32785	0.355858
LysoPE 14:0	Lipids	LPE	-	1.31353	0.417078
LysoPE 14:0(2n isomer)	Lipids	LPE	-	1.35318	0.371024
LysoPE 15:0(2n isomer)	Lipids	LPE	-	1.33395	0.472219
LysoPE 15:1(2n isomer)	Lipids	LPE	-	1.27621	0.472833
LysoPE 16:0	Lipids	LPE	53862-35-4	1.28993	0.408705
LysoPE 16:0(2n isomer)	Lipids	LPE	-	1.089	0.385744
LysoPE 18:3	Lipids	LPE	-	1.29739	0.490257
LysoPE 20:2	Lipids	LPE	-	1.31767	0.351875
2'-Deoxyinosine-5'-monophosphate	Nucleotides and derivatives	Nucleotides and derivatives	3393-18-8	1.36975	0.00074517
2-Deoxyribose-1-phosphate	Nucleotides and derivatives	Nucleotides and derivatives	17210-42-3	1.37245	0.000478048
8-Hydroxyguanosine	Nucleotides and derivatives	Nucleotides and derivatives	3868-31-3	1.14322	0.428065
9-(Arabinosyl)hypoxanthine	Nucleotides and derivatives	Nucleotides and derivatives	7013-16-3	1.34741	0.417863
Xanthosine	Nucleotides and derivatives	Nucleotides and derivatives	146-80-5	1.31562	0.443344
(-)-Jasmonoyl-L-Isoleucine	Organic acids	Organic acids	120330-93-0	1.37711	0.243043
2,3-Dihydroxy-3-Methylbutanoic Acid	Organic acids	Organic acids	1756-18-9	1.15665	0.414772
2,3-Dihydroxybenzoic Acid	Organic acids	Organic acids	303-38-8	1.28439	0.293494
3-Dehydro-L-Threonic Acid	Organic acids	Organic acids	-	1.3327	0.47327
6-Hydroxyhexanoic acid	Organic acids	Organic acids	1191-25-9	1.26574	0.417289
Cis-Aconitic acid	Organic acids	Organic acids	585-84-2	1.37272	0.278535
Isocitric Acid	Organic acids	Organic acids	320-77-4	1.30938	0.444353
L-Malic acid	Organic acids	Organic acids	97-67-6	1.28842	0.470354
Phenylpyruvic acid	Organic acids	Organic acids	156-06-9	1.35406	0.331327
Phthalic acid	Organic acids	Organic acids	88-99-3	1.32005	0.401715
Shikimic acid	Organic acids	Organic acids	138-59-0	1.36272	0.206844
Succinic anhydride	Organic acids	Organic acids	108-30-5	1.37028	0.413571
γ-Aminobutyric acid	Organic acids	Organic acids	56-12-2	1.19491	0.442871
D-Glucoronic acid	Others	Saccharides and Alcohols	6556-12-3	1.29608	0.443161
D-Threonic Acid	Others	Saccharides and Alcohols	3909-12-4	1.37453	0.0759357
D-Pantothenic Acid	Others	Vitamin	79-83-4	1.36573	0.480736
1-O-Feruloylquinic acid	Phenolic acids	Phenolic acids	-	1.37455	0.08376
1-O-p-Coumaroylquinic acid	Phenolic acids	Phenolic acids	-	1.37479	0.172052
2-Hydroxybenzaldehyde (Salicylaldehyde)	Phenolic acids	Phenolic acids	90-02-8	1.33371	0.480523
3-(4-Hydroxyphenyl)-propionic acid	Phenolic acids	Phenolic acids	501-97-3	1.20251	0.436988
3,4-Dihydroxybenzoic acid (Protocatechuic acid)	Phenolic acids	Phenolic acids	99-50-3	1.2784	0.265419
3-O-Feruloylquinic acid	Phenolic acids	Phenolic acids	1899-29-2	1.37668	0.117798
3-O-Feruloylquinic acid-O-glucoside	Phenolic acids	Phenolic acids	-	1.36681	0.231254
4-Aminobenzoic acid	Phenolic acids	Phenolic acids	150-13-0	1.10182	0.49096
4-Hydroxy-3-methoxymandelate	Phenolic acids	Phenolic acids	55-10-7	1.30926	0.363095
4-O-Sinapoylquinic acid	Phenolic acids	Phenolic acids	-	1.29386	0.393349
5-O-Caffeoylshikimic acid	Phenolic acids	Phenolic acids	180981-12-8	1.37151	0.158613
5-O-Feruloyl quinic acid glucoside	Phenolic acids	Phenolic acids	-	1.37554	0.269031
5-O-Feruloylquinic acid	Phenolic acids	Phenolic acids	-	1.37672	0.0208487
6-O-Caffeoyl-D-glucose	Phenolic acids	Phenolic acids	-	1.3174	0.487941
Chlorogenic acid (3-O-Caffeoylquinic acid)	Phenolic acids	Phenolic acids	327-97-9	1.37255	0.425605
Chlorogenic acid methyl ester	Phenolic acids	Phenolic acids	29708-87-0	1.37345	0.216532
Ferulic acid-4-O-glucoside	Phenolic acids	Phenolic acids	117405-51-3	1.37031	0.395699
Feruloyl syringic acid	Phenolic acids	Phenolic acids	-	1.37131	0.402956
Feruloylmalic acid	Phenolic acids	Phenolic acids	-	1.3532	0.231611
Maleoyl-caffeoylquinic acid	Phenolic acids	Phenolic acids	-	1.37727	0.000157828
Neochlorogenic acid (5-O-Caffeoylquinic acid)	Phenolic acids	Phenolic acids	906-33-2	1.36921	0.487078
p-Hydroxyphenyl acetic acid	Phenolic acids	Phenolic acids	156-38-7	1.08734	0.0736504
Quinacyl syringic acid	Phenolic acids	Phenolic acids	-	1.3015	0.364945
Trans-5-O-(p-Coumaroyl)shikimate	Phenolic acids	Phenolic acids	-	1.26445	0.358485
2-Hydroxyoleanolic acid	Terpenoids	Triterpene	26707-60-8	1.15169	0.136318
3,24-Dihydroxy-17,21-semiacetal-12(13)oleanolic fruit	Terpenoids	Triterpene	-	1.13936	0.149838

## Sheet: SS leaf
Compounds	Class I	Class II	CAS	VIP	Fold_Change
3-Indoleacrylic acid	Alkaloids	Alkaloids	1204-06-4	1.18891	5.15238
Acetylcholine	Alkaloids	Alkaloids	60-31-1	1.05332	2.09894
Caffeoylcholine-4-O-glucoside	Alkaloids	Alkaloids	-	1.01178	2.07349
Cis-N-Feruloyltyramine	Alkaloids	Alkaloids	80510-09-4	1.1528	9.60366
DIMBOA glucoside	Alkaloids	Alkaloids	18607-79-9	1.19496	2.82618
DL-2-Aminoadipic acid	Alkaloids	Alkaloids	542-32-5	1.19464	2.38642
N-Acetyl-5-hydroxytryptamine	Alkaloids	Alkaloids	1210-83-9	1.12635	2.00735
N-Benzylmethylene isomethylamine	Alkaloids	Alkaloids	-	1.19602	2.49396
Nicotinic Acid Methyl Ester(Methyl Nicotinate)	Alkaloids	Alkaloids	93-60-7	1.194	3.34045
Cadaverine	Alkaloids	Phenolamine	462-94-2	1.19076	9.76472
Diferuloylcadaverine	Alkaloids	Phenolamine	-	1.02717	24.0213
N-(4'-O-glycosyl)-feruloyl agmatine	Alkaloids	Phenolamine	-	1.19119	2.78898
N-(4'-O-glycosyl)-p-coumaroyl agmatine	Alkaloids	Phenolamine	-	1.14774	9.87251
N,N'-Diferuloylputrescine	Alkaloids	Phenolamine	42369-86-8	1.15414	84.3774
N-Acetylputrescine	Alkaloids	Phenolamine	18233-70-0	1.1833	9.82674
N-Caffeoylputrescine	Alkaloids	Phenolamine	29554-26-5	1.19723	2482.89
N-Feruloyl-Cadaverine	Alkaloids	Phenolamine	-	1.03783	3.12763
N-Feruloylhydroxyputrescine	Alkaloids	Phenolamine	-	1.09453	4.52191
N-Feruloylputrescine	Alkaloids	Phenolamine	501-13-3	1.1936	6.5076
N-Feruloylserotonin	Alkaloids	Phenolamine	68573-23-9	1.00215	8.92515
N-Feruloyltryptamine	Alkaloids	Phenolamine	53905-13-8	1.14923	34.2208
N-Feruloyltyramine	Alkaloids	Phenolamine	66648-43-9	1.171	11.8397
N-Glucosyl-p-coumaroylputrescine	Alkaloids	Phenolamine	-	1.17821	5.07664
N-p-Coumaroylhydroxyputrescine	Alkaloids	Phenolamine	-	1.17527	8.01206
N-p-Coumaroyl-N'-feruloylputrescine	Alkaloids	Phenolamine	380302-96-5	1.16908	66.366
p-Coumaroylagmatine	Alkaloids	Phenolamine	7295-86-5	1.17256	16.3165
p-Coumaroylcadaverine	Alkaloids	Phenolamine	-	1.08884	3.30807
p-Coumaroylferuloylcadaverine	Alkaloids	Phenolamine	-	1.04791	12.964
Sinapoylputrescine	Alkaloids	Phenolamine	70185-57-8	1.19728	1036.82
3-Indolepropionic acid	Alkaloids	Plumerane	830-96-6	1.1963	2026.59
Indole	Alkaloids	Plumerane	120-72-9	1.17124	5.20127
Indole-3-carboxaldehyde	Alkaloids	Plumerane	487-89-8	1.18092	3.87932
Indole-3-carboxylic acid	Alkaloids	Plumerane	771-50-6	1.18517	11.7597
Indole-5-carboxylic acid	Alkaloids	Plumerane	1670-81-1	1.18742	11.6489
Methoxyindoleacetic acid	Alkaloids	Plumerane	3471-31-6	1.19013	5.69393
Serotonin	Alkaloids	Plumerane	50-67-9	1.15375	2.12877
Tryptamine	Alkaloids	Plumerane	61-54-1	1.15969	4.41745
3-Hydroxy-3-methylpentane-1,5-dioic acid	Amino acids and derivatives	Amino acids and derivatives	503-49-1	1.19443	2.43117
5-Hydroxy-L-tryptophan	Amino acids and derivatives	Amino acids and derivatives	56-69-9	1.18444	8.61925
5-Oxo-L-Proline	Amino acids and derivatives	Amino acids and derivatives	98-79-3	1.12198	2.8533
L-Alanyl-L-Alanine	Amino acids and derivatives	Amino acids and derivatives	1948-31-8	1.19465	1007.41
L-Alanyl-L-Phenylalanine	Amino acids and derivatives	Amino acids and derivatives	3061-90-3	1.16398	4.18043
L-Aspartic acid-O-diglucoside	Amino acids and derivatives	Amino acids and derivatives	-	1.19549	30.1194
L-Aspartyl-L-Phenylalanine	Amino acids and derivatives	Amino acids and derivatives	13433-09-5	1.16062	4.44875
L-Cysteine	Amino acids and derivatives	Amino acids and derivatives	52-90-4	1.19571	10.5032
L-Glycyl-L-isoleucine	Amino acids and derivatives	Amino acids and derivatives	19461-38-2	1.17582	3.24711
L-Glycyl-L-phenylalanine	Amino acids and derivatives	Amino acids and derivatives	721-66-4	1.15939	2.98996
L-Glycyl-L-proline	Amino acids and derivatives	Amino acids and derivatives	704-15-4	1.12957	2.5255
L-Isoleucyl-L-Aspartate	Amino acids and derivatives	Amino acids and derivatives	-	1.18121	3.50335
L-Leucyl-L-Leucine	Amino acids and derivatives	Amino acids and derivatives	3303-31-9	1.16044	2.19646
L-Leucyl-L-phenylalanine	Amino acids and derivatives	Amino acids and derivatives	56217-82-4	1.18407	2.28527
L-Phenylalanine	Amino acids and derivatives	Amino acids and derivatives	63-91-2	1.19459	2.48994
L-Phenylalanyl-L-phenylalanine	Amino acids and derivatives	Amino acids and derivatives	2577-40-4	1.11512	2.02704
L-Proline	Amino acids and derivatives	Amino acids and derivatives	147-85-3	1.19539	10.9659
L-Prolyl-L-Leucine	Amino acids and derivatives	Amino acids and derivatives	52899-07-7	1.18823	4.19159
L-Prolyl-L-Phenylalanine	Amino acids and derivatives	Amino acids and derivatives	13589-02-1	1.16714	12.2682
L-Saccharopine	Amino acids and derivatives	Amino acids and derivatives	997-68-2	1.18373	7.34605
L-Tryptophan	Amino acids and derivatives	Amino acids and derivatives	73-22-3	1.18856	4.27985
L-Valyl-L-Leucine	Amino acids and derivatives	Amino acids and derivatives	3989-97-7	1.16678	2.84505
L-Valyl-L-Phenylalanine	Amino acids and derivatives	Amino acids and derivatives	3918-92-1	1.13649	2.85588
N-Acetyl-L-Arginine	Amino acids and derivatives	Amino acids and derivatives	155-84-0	1.17328	3.04791
N-Acetyl-L-glutamic acid	Amino acids and derivatives	Amino acids and derivatives	1188-37-0	1.19587	2.32084
N-Acetyl-L-Glutamine	Amino acids and derivatives	Amino acids and derivatives	2490-97-3	1.05915	2.04707
N-Acetyl-L-glycine	Amino acids and derivatives	Amino acids and derivatives	543-24-8	1.15655	4.34238
N-Acetyl-L-leucine	Amino acids and derivatives	Amino acids and derivatives	1188-21-2	1.19574	12.7332
N-Acetyl-L-methionine	Amino acids and derivatives	Amino acids and derivatives	65-82-7	1.17266	3.51105
N-Acetyl-L-phenylalanine	Amino acids and derivatives	Amino acids and derivatives	2018-61-3	1.18966	7.2255
N-Acetyl-L-Tryptophan	Amino acids and derivatives	Amino acids and derivatives	1218-34-4	1.17478	3.06477
N-Acetyl-L-tyrosine	Amino acids and derivatives	Amino acids and derivatives	537-55-3	1.18594	3.7283
N-Formyl-L-Methionine	Amino acids and derivatives	Amino acids and derivatives	4289-98-9	1.10655	2.0023
N-Glycyl-L-leucine	Amino acids and derivatives	Amino acids and derivatives	869-19-2	1.1645	3.37588
Hesperetin-5,7-di-O-glucoside	Flavonoids	Dihydroflavonol	-	1.14895	2.08202
Apigenin-7,4'-dimethyl ether	Flavonoids	Flavones	5128-44-9	1.01041	2.52571
Apigenin-7-O-(6''-malonyl)glucoside	Flavonoids	Flavones	86546-87-4	1.16395	2.98757
Apigenin-7-O-glucuronide	Flavonoids	Flavones	29741-09-1	1.18237	2.44043
Chrysoeriol-7-O-(6''-malonyl)glucoside	Flavonoids	Flavones	-	1.17249	3.66502
Chrysoeriol-7-O-(6''-sinapoyl)glucoside	Flavonoids	Flavones	-	1.13853	3.94118
Chrysoeriol-8-C-glucoside (Scoparin)	Flavonoids	Flavones	301-16-6	1.18299	2.40464
Diosmetin-6-C-glucoside	Flavonoids	Flavones	-	1.18204	2.40694
Diosmetin-7-O-(6''-malonyl)glucoside	Flavonoids	Flavones	-	1.17056	3.7429
Isoluteolin-6,8-di-C-glucoside	Flavonoids	Flavones	-	1.16178	4.41264
Isorhamnetin-3-O-(6''-malonylglucoside)	Flavonoids	Flavones	-	1.17898	5.87475
Kaempferol-6,8-di-C-glucoside	Flavonoids	Flavones	-	1.02046	3.23731
Luteolin (5,7,3',4'-Tetrahydroxyflavone)	Flavonoids	Flavones	491-70-3	1.16113	3.20722
Luteolin-7-O-(6''-sinapoyl)glucoside	Flavonoids	Flavones	-	1.1961	2032.78
Nepetin-7-O-glucoside	Flavonoids	Flavones	569-90-4	1.14565	2.00964
Tricin-7-O-Glucuronide	Flavonoids	Flavones	-	1.16355	2.15213
Vitexin-7-O-rutinoside	Flavonoids	Flavones	-	1.16849	2.12514
Apigenin-6,8-di-C-arabinoside	Flavonoids	Flavonoid carbonoside	-	1.19339	2.18431
Apigenin-6-C-arabinoside-8-C-xyloside	Flavonoids	Flavonoid carbonoside	-	1.18861	2.18944
Apigenin-6-C-xyloside-8-C-arabinoside	Flavonoids	Flavonoid carbonoside	-	1.19589	2.43273
Hispidulin-8-C-glucoside	Flavonoids	Flavonoid carbonoside	-	1.18589	2.43613
Isoorientin-7-O-glucoside	Flavonoids	Flavonoid carbonoside	-	1.10355	2.29974
Orientin-6-C-arabinoside	Flavonoids	Flavonoid carbonoside	-	1.17103	2.41832
Orientin-7-O-arabinoside	Flavonoids	Flavonoid carbonoside	-	1.17729	2.4075
Isorhamnetin-3-O-(6''-acetylglucoside)	Flavonoids	Flavonols	-	1.19722	742.856
Kaempferol-3-O-(6''-malonyl)galactoside	Flavonoids	Flavonols	-	1.13903	2.87611
Kaempferol-7-O-glucuronide	Flavonoids	Flavonols	-	1.167	2.38444
6''-O-Malonylgenistin	Flavonoids	Isoflavones	51011-05-3	1.16867	4.45309
4-Hydroxycoumarin	Lignans and Coumarins	Coumarins	1076-38-6	1.17804	5.239
Coumarin O-rutinoside	Lignans and Coumarins	Coumarins	-	1.16415	4.93771
Syringaresinol	Lignans and Coumarins	Lignans	21453-69-0	1.09601	2.25749
2R-Hydroxyoctadecanoic Acid	Lipids	Free fatty acids	26633-48-7	1.17905	2.10728
1-O-Caffeoyl-3-O-p-coumaroylglycerol	Lipids	Glycerol ester	-	1.19448	1877.11
LysoPC 20:0	Lipids	LPC	108341-80-6	1.19239	8.89642
Choline Alfoscerate	Lipids	PC	28319-77-9	1.08817	5.7474
2'-Deoxyadenosine	Nucleotides and derivatives	Nucleotides and derivatives	958-09-8	1.18587	4.20865
2-Deoxyribose-5'-phosphate	Nucleotides and derivatives	Nucleotides and derivatives	102916-66-5	1.19452	2.68902
2'-Deoxyuridine	Nucleotides and derivatives	Nucleotides and derivatives	951-78-0	1.19687	2941.11
3'-Adenylic Acid	Nucleotides and derivatives	Nucleotides and derivatives	84-21-9	1.13768	3.53234
6-Methylmercaptopurine	Nucleotides and derivatives	Nucleotides and derivatives	50-66-8	1.19438	2.33753
Adenosine 5'-monophosphate	Nucleotides and derivatives	Nucleotides and derivatives	61-19-8	1.19297	8.02565
Cordycepin (3'-Deoxyadenosine)	Nucleotides and derivatives	Nucleotides and derivatives	73-03-0	1.167	4.56493
Cytarabine	Nucleotides and derivatives	Nucleotides and derivatives	147-94-4	1.17769	3.57884
Guanosine 3',5'-cyclic monophosphate	Nucleotides and derivatives	Nucleotides and derivatives	7665-99-8	1.17404	2.12219
Isopentenyladenine-7-N-glucoside	Nucleotides and derivatives	Nucleotides and derivatives	-	1.19464	35.4537
1-Aminocyclopropane-1-carboxylic acid	Organic acids	Organic acids	22059-21-8	1.19561	2152.81
2-Hydroxyglutaric Acid	Organic acids	Organic acids	13095-48-2	1.13927	2.70989
2-Hydroxyhexadecanoic acid	Organic acids	Organic acids	764-67-0	1.12479	2.58268
2-Oxoadipic acid	Organic acids	Organic acids	3184-35-8	1.15636	3.52186
3-Hydroxybenzoic Acid	Organic acids	Organic acids	99-06-9	1.19253	4.60476
3-Methyl-2-Oxobutanoic acid	Organic acids	Organic acids	759-05-7	1.16516	2.48852
3-Methylmalic acid	Organic acids	Organic acids	152204-30-3	1.15583	3.42196
4-Acetamidobutyric acid	Organic acids	Organic acids	3025-96-5	1.16879	3.96396
4-Oxopentanoic Acid	Organic acids	Organic acids	123-76-2	1.11649	2.50934
5-Acetamidopentanoic Acid	Organic acids	Organic acids	1072-10-2	1.18267	3.4126
Argininosuccinic acid	Organic acids	Organic acids	2387-71-5	1.19153	5.64649
Benzoylformic acid	Organic acids	Organic acids	611-73-4	1.197	12054
Cis-Aconitic acid	Organic acids	Organic acids	585-84-2	1.16764	2.07843
D-Erythronolactone	Organic acids	Organic acids	15667-21-7	1.19721	11.683
DL-Glyceraldehyde-3-phosphate	Organic acids	Organic acids	591-59-3	1.19534	1569.47
Glutaric acid	Organic acids	Organic acids	110-94-1	1.15002	3.81303
Muconic acid	Organic acids	Organic acids	1119-72-8	1.19675	5.92577
Phosphoenolpyruvate	Organic acids	Organic acids	138-08-9	1.16741	2.61038
Succinic semialdehyde	Organic acids	Organic acids	692-29-5	1.17223	3.73035
β-Hydroxyisovaleric acid	Organic acids	Organic acids	625-08-1	1.18139	2.08311
D-Arabinose	Others	Saccharides and Alcohols	10323-20-3	1.16743	2.97033
D-Fructose-1,6-biphosphate	Others	Saccharides and Alcohols	488-69-7	1.15718	3.77918
Dihydroxyacetone phosphate	Others	Saccharides and Alcohols	57-04-5	1.18819	4.45784
D-Lactulose	Others	Saccharides and Alcohols	4618-18-2	1.17968	4.11095
D-Maltose	Others	Saccharides and Alcohols	133-99-3	1.19682	7.61024
D-Melezitose	Others	Saccharides and Alcohols	597-12-6	1.0832	3.96702
D-Panose	Others	Saccharides and Alcohols	33401-87-5	1.17459	4.26898
D-Sucrose	Others	Saccharides and Alcohols	57-50-1	1.19685	10.8341
D-Trehalose	Others	Saccharides and Alcohols	99-20-7	1.19559	5.80721
Galactinol	Others	Saccharides and Alcohols	3687-64-7	1.19087	9.02672
Isomaltulose	Others	Saccharides and Alcohols	13718-94-0	1.19137	8.74046
Lactobiose	Others	Saccharides and Alcohols	63-42-3	1.19452	8.93568
Melibiose	Others	Saccharides and Alcohols	585-99-9	1.1876	7.01428
Raffinose	Others	Saccharides and Alcohols	512-69-6	1.19486	10.261
Sorbitol-6-phosphate	Others	Saccharides and Alcohols	20479-58-7	1.19518	10.2784
Stachyose	Others	Saccharides and Alcohols	470-55-3	1.13837	4.1068
Turanose	Others	Saccharides and Alcohols	547-25-1	1.1968	38.0366
4-Pyridoxic acid	Others	Vitamin	82-82-6	1.17775	2.93487
4-Pyridoxic acid-O-glucoside	Others	Vitamin	-	1.18503	2.71459
Dehydroascorbic acid	Others	Vitamin	490-83-5	1.17753	5.49184
Pyridoxine-5'-O-glucoside	Others	Vitamin	-	1.17408	2.41908
1,2-O-Diferuloylglycerol	Phenolic acids	Phenolic acids	-	1.1781	17.8171
1,3-O-Diferuloylglycerol	Phenolic acids	Phenolic acids	83008-46-2	1.17597	19.7946
1,3-O-Di-p-Coumaroylglycerol	Phenolic acids	Phenolic acids	-	1.08928	369.814
1-O-[(E)-Caffeoyl]-D-glucose	Phenolic acids	Phenolic acids	-	1.1799	3.89323
1-O-Feruloyl-3-O-p-Coumaroylglycerol	Phenolic acids	Phenolic acids	-	1.16346	100.04
1-O-Gentisoyl-D-glucoside	Phenolic acids	Phenolic acids	23445-11-6	1.19689	3.90378
1-O-p-Cumaroylglycerol	Phenolic acids	Phenolic acids	106055-11-2	1.19747	1195.21
1-O-Salicyl-D-glucose	Phenolic acids	Phenolic acids	60517-74-0	1.19263	10.0123
2,5-Dihydroxybenzaldehyde	Phenolic acids	Phenolic acids	1194-98-5	1.17298	3.06211
2,6-Dihydroxybenzoic acid	Phenolic acids	Phenolic acids	303-07-1	1.19301	6.16194
2-Feruloyl-sn-glycerol	Phenolic acids	Phenolic acids	-	1.08093	2.00921
3,4-Dihydroxybenzeneacetic acid	Phenolic acids	Phenolic acids	102-32-9	1.18526	8.87584
3-Hydroxycinnamic Acid	Phenolic acids	Phenolic acids	14755-02-3	1.07168	3.004
4-Hydroxybenzoic acid	Phenolic acids	Phenolic acids	99-96-7	1.175	3.15307
4-Methoxycinnamic acid	Phenolic acids	Phenolic acids	830-09-1	1.17892	2.23516
6-O-Caffeoyl-D-glucose	Phenolic acids	Phenolic acids	-	1.09593	2.21491
6-O-Feruloyl-D-glucose	Phenolic acids	Phenolic acids	137887-25-3	1.1967	11.1676
Benzoylmalic acid	Phenolic acids	Phenolic acids	22138-51-8	1.19126	2.272
Caffeic acid	Phenolic acids	Phenolic acids	331-39-5	1.1928	2.26052
Di-O-Glucosylquinic acid	Phenolic acids	Phenolic acids	-	1.18581	3.65762
Homogentisic acid	Phenolic acids	Phenolic acids	451-13-8	1.18453	8.80783
Methyl sinapate	Phenolic acids	Phenolic acids	20733-94-2	1.18496	2.97422
p-Hydroxyphenyl acetic acid	Phenolic acids	Phenolic acids	156-38-7	1.16881	3.18775
Protocatechualdehyde	Phenolic acids	Phenolic acids	139-85-5	1.16834	3.18689
Protocatechuic acid-4-O-glucoside	Phenolic acids	Phenolic acids	-	1.19244	4.05392
3-Methoxy-juglone	Quinones	Quinones	-	1.18985	4.3083
1-O-Galloyl-D-glucose	Tannins	Tannin	58511-73-2	1.18863	3.29553
Histidinol	Alkaloids	Alkaloids	501-28-0	1.18659	0.398307
N-Oleoylethanolamine	Alkaloids	Alkaloids	111-58-0	1.1853	0.482579
Trigonelline	Alkaloids	Alkaloids	535-83-1	1.19404	0.409822
Putrescine	Alkaloids	Phenolamine	110-60-1	1.19762	0.000128962
Spermine	Alkaloids	Phenolamine	71-44-3	1.17873	0.378544
3-Methyl-L-Histidine	Amino acids and derivatives	Amino acids and derivatives	368-16-1	1.17883	0.450073
Glutathione reduced form	Amino acids and derivatives	Amino acids and derivatives	70-18-8	1.07216	0.44011
L-Aspartic Acid	Amino acids and derivatives	Amino acids and derivatives	56-84-8	1.1897	0.475447
L-Glutamic acid	Amino acids and derivatives	Amino acids and derivatives	56-86-0	1.19344	0.378335
L-Glutamic acid-O-glycoside	Amino acids and derivatives	Amino acids and derivatives	-	1.18109	0.050634
L-Glutamine-O-glycoside	Amino acids and derivatives	Amino acids and derivatives	-	1.13907	0.203717
L-Homocysteine	Amino acids and derivatives	Amino acids and derivatives	6027-13-0	1.19504	0.00115955
L-Methionine Sulfoxide	Amino acids and derivatives	Amino acids and derivatives	3226-65-1	1.19098	0.384832
L-threo-3-Methylaspartate	Amino acids and derivatives	Amino acids and derivatives	6061-13-8	1.19566	0.334392
Nicotianamine	Amino acids and derivatives	Amino acids and derivatives	34441-14-0	1.18081	0.225008
Eriodictyol-7-O-glucoside	Flavonoids	Dihydroflavone	38965-51-4	1.09265	0.45284
Chrysoeriol-7-O-rutinoside	Flavonoids	Flavones	-	1.13645	0.486826
Kaempferol-4'-O-glucoside	Flavonoids	Flavones	-	1.09886	0.49346
Limocitrin-7-O-glucoside	Flavonoids	Flavones	-	1.12866	0.415486
Luteolin-7-O-glucoside (Cynaroside)	Flavonoids	Flavones	5373-11-5	1.09838	0.493966
Luteolin-7-O-neohesperidoside (Lonicerin)	Flavonoids	Flavones	25694-72-8	1.16538	0.331196
Luteolin-7-O-rutinoside	Flavonoids	Flavones	3563-98-2	1.16901	0.329475
Orientin-2''-O-galactoside	Flavonoids	Flavones	-	1.0138	0.429739
Tricin-4'-O-(β-guaiacylglycerol)ether-7-O-(6''-malonyl)glucoside	Flavonoids	Flavones	-	1.1956	0.403288
Tricin-4'-O-[β-guaiacyl-(9''-O-acetyl)glycerol]ether	Flavonoids	Flavones	-	1.16543	0.299351
Apigenin-6-C-(2''-glucuronyl)xyloside	Flavonoids	Flavonoid carbonoside	-	1.11478	0.117713
Vitexin-7-O-(6''-feruloyl)glucoside	Flavonoids	Flavonoid carbonoside	-	1.17866	0.332168
Vitexin-7-O-(6''-p-coumaroyl)glucoside	Flavonoids	Flavonoid carbonoside	-	1.182	0.360736
Kaempferol-3-O-glucoside (Astragalin)	Flavonoids	Flavonols	480-10-4	1.11449	0.498325
Kaempferol-3-O-robinobioside(Biorobin)	Flavonoids	Flavonols	17297-56-2	1.18461	0.452664
Coumarin	Lignans and Coumarins	Coumarins	91-64-5	1.16876	0.349542
Scopoletin-7-O-glucoside (Scopolin)	Lignans and Coumarins	Coumarins	531-44-2	1.18817	0.0788288
Pinoresinol-4,4'-O-di-O-glucoside	Lignans and Coumarins	Lignans	63902-38-5	1.18411	0.200426
Pinoresinol-4-O-(6''-acetyl)glucoside	Lignans and Coumarins	Lignans	-	1.15375	0.403761
Pinoresinol-4-O-glucoside	Lignans and Coumarins	Lignans	41607-20-9	1.16612	0.421519
10,16-Dihydroxypalmitic acid	Lipids	Free fatty acids	3233-90-7	1.14478	0.411789
12-Hydroxydodecanoic acid	Lipids	Free fatty acids	505-95-3	1.19527	0.425225
7S,8S-DiHODE; (9Z,12Z)-(7S,8S)-Dihydroxyoctadeca-9,12-dienoic acid	Lipids	Free fatty acids	143288-65-7	1.1716	0.279703
Methyl 7,10-hexadecadienoate	Lipids	Free fatty acids	-	1.17675	0.42819
2-Linoleoylglycerol	Lipids	Glycerol ester	3443-82-1	1.18017	0.354819
2-Linoleoylglycerol-1,3-di-O-glucoside	Lipids	Glycerol ester	-	1.15817	0.433761
LysoPC 16:2(2n isomer)	Lipids	LPC	-	1.19225	0.4547
LysoPC 19:0	Lipids	LPC	108273-88-7	1.18226	0.361976
LysoPC 19:2(2n isomer)	Lipids	LPC	-	1.19151	0.491732
LysoPC 20:2(2n isomer)	Lipids	LPC	-	1.19709	0.434073
LysoPE 15:1	Lipids	LPE	-	1.17649	0.30601
LysoPE 15:1(2n isomer)	Lipids	LPE	-	1.11615	0.462817
LysoPE 16:3	Lipids	LPE	-	1.18827	0.304493
LysoPE 18:3(2n isomer)	Lipids	LPE	-	1.19532	0.483702
LysoPE 18:4	Lipids	LPE	-	1.09768	0.492167
LysoPE 20:2	Lipids	LPE	-	1.17983	0.354394
LysoPE 20:2(2n isomer)	Lipids	LPE	-	1.18238	0.425251
LysoPE 20:3	Lipids	LPE	-	1.19014	0.405625
LysoPE 20:4	Lipids	LPE	-	1.18757	0.00634343
3-Dehydrosphinganine	Lipids	Sphingolipids	16105-69-4	1.18809	0.220822
2'-Deoxyinosine-5'-monophosphate	Nucleotides and derivatives	Nucleotides and derivatives	3393-18-8	1.19768	3.32652e-06
5-Aminoimidazole ribonucleotide	Nucleotides and derivatives	Nucleotides and derivatives	25635-88-5	1.18154	0.240144
Uridine 5'-diphosphate	Nucleotides and derivatives	Nucleotides and derivatives	27821-45-0	1.18697	0.404301
Uridine 5'-diphospho-D-glucose	Nucleotides and derivatives	Nucleotides and derivatives	133-89-1	1.19378	0.349895
Xanthine	Nucleotides and derivatives	Nucleotides and derivatives	69-89-6	1.14336	0.44817
(-)-Jasmonoyl-L-Isoleucine	Organic acids	Organic acids	120330-93-0	1.19606	0.123463
2-Methylglutaric acid	Organic acids	Organic acids	617-62-9	1.1801	0.437215
3-Dehydro-L-Threonic Acid	Organic acids	Organic acids	-	1.18305	0.445501
3-Guanidinopropionic acid	Organic acids	Organic acids	353-09-3	1.18859	0.480056
6-Hydroxyhexanoic acid	Organic acids	Organic acids	1191-25-9	1.19004	0.486548
Adipic Acid	Organic acids	Organic acids	124-04-9	1.18919	0.479201
Fumaric acid	Organic acids	Organic acids	110-17-8	1.19762	0.000114821
Hydroxypyruvic acid	Organic acids	Organic acids	1113-60-6	1.17429	0.447207
Jasmonic acid	Organic acids	Organic acids	77026-92-7	1.19018	0.312421
L-Malic acid	Organic acids	Organic acids	97-67-6	1.16872	0.450283
Malonic acid	Organic acids	Organic acids	141-82-2	1.18396	0.412239
Pyruvic acid	Organic acids	Organic acids	127-17-3	1.03894	0.484227
Succinic anhydride	Organic acids	Organic acids	108-30-5	1.19193	0.437351
Tartronate semialdehyde	Organic acids	Organic acids	2480-77-5	1.17262	0.493942
Pantetheine	Others	Others	496-65-1	1.13389	0.479527
N-Acetyl-D-galactosamine	Others	Saccharides and Alcohols	1811-31-0	1.16776	0.279064
N-Acetyl-D-glucosamine	Others	Saccharides and Alcohols	7512-17-6	1.15906	0.363401
Riboflavin (Vitamin B2)	Others	Vitamin	83-88-5	1.18168	0.435347
1-O-Glucosyl sinapate	Phenolic acids	Phenolic acids	78185-48-5	1.17382	0.424841
4-Hydroxy-3-methoxymandelate	Phenolic acids	Phenolic acids	55-10-7	1.14379	0.181667
Feruloyl syringic acid	Phenolic acids	Phenolic acids	-	1.18292	0.387769
Gallacetophenone	Phenolic acids	Phenolic acids	528-21-2	1.19414	0.217002
p-Coumaryl alcohol	Phenolic acids	Phenolic acids	3690-05-9	1.06996	0.466153
Sinapinaldehyde	Phenolic acids	Phenolic acids	4206-58-0	1.18463	0.155403
2-Hydroxyoleanolic acid	Terpenoids	Triterpene	26707-60-8	1.17059	0.467566

## Sheet: 4x leaf
Compounds	Class I	Class II	CAS	VIP	Fold_Change
2,4-Dihydroxy-1,4-benzoxazin-3-one(DIBOA)	Alkaloids	Alkaloids	17359-54-5	1.25747	1472.26
Cis-N-Feruloyltyramine	Alkaloids	Alkaloids	80510-09-4	1.25552	45.6518
DL-2-Aminoadipic acid	Alkaloids	Alkaloids	542-32-5	1.24708	2.3136
Phenethylamine	Alkaloids	Alkaloids	64-04-0	1.23709	2.23212
Cadaverine	Alkaloids	Phenolamine	462-94-2	1.24568	4.28193
Diferuloylcadaverine	Alkaloids	Phenolamine	-	1.25654	776.143
N,N'-Diferuloylputrescine	Alkaloids	Phenolamine	42369-86-8	1.25724	670.937
N1,N8-Bis(sinapoyl)spermidine	Alkaloids	Phenolamine	-	1.14165	2.34389
N-Acetylputrescine	Alkaloids	Phenolamine	18233-70-0	1.24477	3.56175
N-Feruloylserotonin	Alkaloids	Phenolamine	68573-23-9	1.16516	3.59041
N-Feruloyltyramine	Alkaloids	Phenolamine	66648-43-9	1.25812	49.6362
N-Glucosyl-p-coumaroylputrescine	Alkaloids	Phenolamine	-	1.23395	5.15841
N-p-Coumaroyl-N'-feruloylputrescine	Alkaloids	Phenolamine	380302-96-5	1.24836	503.621
p-Coumaroylferuloylcadaverine	Alkaloids	Phenolamine	-	1.25182	135.373
Putrescine	Alkaloids	Phenolamine	110-60-1	1.2395	7.27917
Indole-3-carboxylic acid	Alkaloids	Plumerane	771-50-6	1.23399	3.75494
Indole-5-carboxylic acid	Alkaloids	Plumerane	1670-81-1	1.21872	3.49094
1-Methylpiperidine-2-carboxylic acid	Amino acids and derivatives	Amino acids and derivatives	7730-87-2	1.25193	2.21133
5-L-Glutamyl-L-amino acid	Amino acids and derivatives	Amino acids and derivatives	5875-41-2	1.24237	4.67997
Cycloleucine	Amino acids and derivatives	Amino acids and derivatives	52-52-8	1.24865	2.26795
D-Proline betaine	Amino acids and derivatives	Amino acids and derivatives	1195-94-4	1.24261	2.40132
L-Alanyl-L-Alanine	Amino acids and derivatives	Amino acids and derivatives	1948-31-8	1.02134	13.6266
L-Alanyl-L-Phenylalanine	Amino acids and derivatives	Amino acids and derivatives	3061-90-3	1.24791	6.2521
L-Aspartic acid-O-diglucoside	Amino acids and derivatives	Amino acids and derivatives	-	1.25097	10.6583
L-Aspartyl-L-Phenylalanine	Amino acids and derivatives	Amino acids and derivatives	13433-09-5	1.22992	6.76411
L-Cysteine	Amino acids and derivatives	Amino acids and derivatives	52-90-4	1.25628	28.6865
L-Glutamine	Amino acids and derivatives	Amino acids and derivatives	56-85-9	1.25603	2.36989
L-Glycyl-L-isoleucine	Amino acids and derivatives	Amino acids and derivatives	19461-38-2	1.24561	4.4672
L-Glycyl-L-phenylalanine	Amino acids and derivatives	Amino acids and derivatives	721-66-4	1.23087	4.01246
L-Homocystine	Amino acids and derivatives	Amino acids and derivatives	626-72-2	1.2126	4.69037
L-Homomethionine	Amino acids and derivatives	Amino acids and derivatives	25148-30-5	1.22281	3.28242
L-Isoleucyl-L-Aspartate	Amino acids and derivatives	Amino acids and derivatives	-	1.20945	7.85249
L-Leucyl-L-Leucine	Amino acids and derivatives	Amino acids and derivatives	3303-31-9	1.21148	2.71098
L-Leucyl-L-phenylalanine	Amino acids and derivatives	Amino acids and derivatives	56217-82-4	1.25323	3.54211
L-Lysine	Amino acids and derivatives	Amino acids and derivatives	56-87-1	1.25593	2.43108
L-Ornithine	Amino acids and derivatives	Amino acids and derivatives	70-26-8	1.19268	2.41669
L-Phenylalanyl-L-phenylalanine	Amino acids and derivatives	Amino acids and derivatives	2577-40-4	1.21833	3.02595
L-Proline	Amino acids and derivatives	Amino acids and derivatives	147-85-3	1.25656	24.4018
L-Prolyl-L-Leucine	Amino acids and derivatives	Amino acids and derivatives	52899-07-7	1.2527	5.1789
L-Prolyl-L-Phenylalanine	Amino acids and derivatives	Amino acids and derivatives	13589-02-1	1.25369	8.43359
L-Saccharopine	Amino acids and derivatives	Amino acids and derivatives	997-68-2	1.23384	2.06124
L-Valyl-L-Leucine	Amino acids and derivatives	Amino acids and derivatives	3989-97-7	1.24963	4.37049
L-Valyl-L-Phenylalanine	Amino acids and derivatives	Amino acids and derivatives	3918-92-1	1.23479	4.04922
N-Acetyl-L-glycine	Amino acids and derivatives	Amino acids and derivatives	543-24-8	1.17377	2.15947
N-Acetyl-L-leucine	Amino acids and derivatives	Amino acids and derivatives	1188-21-2	1.25341	2.84923
N-Acetyl-L-phenylalanine	Amino acids and derivatives	Amino acids and derivatives	2018-61-3	1.24567	3.02102
N-Acetyl-L-Tryptophan	Amino acids and derivatives	Amino acids and derivatives	1218-34-4	1.24674	30.877
N-Glycyl-L-leucine	Amino acids and derivatives	Amino acids and derivatives	869-19-2	1.24819	4.51567
6,7,8-Tetrahydroxy-5-methoxyflavone	Flavonoids	Flavones	-	1.2286	6.0054
Apigenin-7-O-glucuronide	Flavonoids	Flavones	29741-09-1	1.16436	4.17921
Apigenin-7-O-neohesperidoside (Rhoifolin)	Flavonoids	Flavones	17306-46-6	1.24963	2.47831
Apigenin-8-C-Arabinoside	Flavonoids	Flavones	-	1.22061	2.33476
Diosmetin (5,7,3'-Trihydroxy-4'-methoxyflavone)	Flavonoids	Flavones	520-34-3	1.2295	5.75061
Diosmetin-7-O-glucuronide	Flavonoids	Flavones	35110-20-4	1.22785	2.58459
Diosmetin-7-O-rutinoside (Diosmin)	Flavonoids	Flavones	520-27-4	1.2484	3.61943
Hispidulin (5,7,4'-Trihydroxy-6-methoxyflavone)	Flavonoids	Flavones	1447-88-7	1.2295	6.20541
Isorhamnetin-3-O-rutinoside (Narcissin)	Flavonoids	Flavones	604-80-8	1.23696	2.17891
Kaempferol-3-O-rutinoside(Nicotiflorin)	Flavonoids	Flavones	17650-84-9	1.1035	2.4676
Luteolin (5,7,3',4'-Tetrahydroxyflavone)	Flavonoids	Flavones	491-70-3	1.11136	2.64003
Luteolin-7-O-glucuronide	Flavonoids	Flavones	29741-10-4	1.15575	3.61142
Luteolin-7-O-neohesperidoside (Lonicerin)	Flavonoids	Flavones	25694-72-8	1.18313	5.28831
Luteolin-7-O-rutinoside	Flavonoids	Flavones	3563-98-2	1.12445	4.24413
Rhamnocitrin (7-Methylkaempferol)	Flavonoids	Flavones	569-92-6	1.23342	5.73134
Scutellarein-7-O-glucuronide (Scutellarin)	Flavonoids	Flavones	27740-01-8	1.20205	3.81839
Tetahydroxyflavone-7-O-glucuronide	Flavonoids	Flavones	-	1.16771	3.22528
Tricin-7-O-Glucuronide	Flavonoids	Flavones	-	1.23593	4.59728
Apigenin-6,8-di-C-arabinoside	Flavonoids	Flavonoid carbonoside	-	1.24149	4.18986
Apigenin-6-C-arabinoside-8-C-xyloside	Flavonoids	Flavonoid carbonoside	-	1.25621	4.27777
Apigenin-6-C-xyloside-8-C-arabinoside	Flavonoids	Flavonoid carbonoside	-	1.25473	4.81927
Kaempferol-3-O-(6''-acetyl)glucoside	Flavonoids	Flavonols	-	1.24723	5.16674
Kaempferol-3-O-glucuronide	Flavonoids	Flavonols	22688-78-4	1.1883	3.45928
Kaempferol-3-O-neohesperidoside	Flavonoids	Flavonols	32602-81-6	1.23905	2.20809
Kaempferol-3-O-robinobioside(Biorobin)	Flavonoids	Flavonols	17297-56-2	1.17536	6.86254
Quercetin-3-O-(4''-O-glucosyl)rhamnoside	Flavonoids	Flavonols	59262-54-3	1.18387	2.50411
Quercetin-3-O-glucuronide	Flavonoids	Flavonols	22688-79-5	1.23143	3.04697
Quercetin-3-O-neohesperidoside	Flavonoids	Flavonols	117611-67-3	1.10341	2.61997
Quercetin-3-O-robinobioside	Flavonoids	Flavonols	52525-35-6	1.19091	2.76635
Quercetin-3-O-rutinoside (Rutin)	Flavonoids	Flavonols	153-18-4	1.19141	2.69663
Quercetin-7-O-(6''-malonyl)glucoside	Flavonoids	Flavonols	-	1.22416	2.32369
Quercetin-7-O-rutinoside	Flavonoids	Flavonols	147714-62-3	1.1665	2.52419
Pratensein	Flavonoids	Isoflavones	2284-31-3	1.23413	5.70945
4-Hydroxycoumarin	Lignans and Coumarins	Coumarins	1076-38-6	1.17331	2.81616
Ayapin	Lignans and Coumarins	Coumarins	494-56-4	1.24939	3.34461
Pinoresinol	Lignans and Coumarins	Lignans	487-36-5	1.06174	2.016
Syringaresinol	Lignans and Coumarins	Lignans	21453-69-0	1.08316	2.19781
9,10-Dihydroxy-12,13-epoxyoctadecanoic acid	Lipids	Free fatty acids	-	1.13094	2.21407
9-Hydroxy-12-oxo-15(Z)-octadecenoic acid	Lipids	Free fatty acids	-	1.23686	2.92599
1-O-Caffeoyl-3-O-p-coumaroylglycerol	Lipids	Glycerol ester	-	1.25867	17550.7
1-Stearidonoyl-Glycerol	Lipids	Glycerol ester	-	1.23472	2.50147
LysoPC 20:0	Lipids	LPC	108341-80-6	1.20706	3.85682
LysoPC 22:5	Lipids	LPC	-	1.25184	240.707
Choline Alfoscerate	Lipids	PC	28319-77-9	1.25042	7288.89
2-(Dimethylamino)guanosine	Nucleotides and derivatives	Nucleotides and derivatives	2140-67-2	1.22711	3.59099
2'-Deoxyadenosine	Nucleotides and derivatives	Nucleotides and derivatives	958-09-8	1.24607	2.53617
2'-Deoxycytidine	Nucleotides and derivatives	Nucleotides and derivatives	951-77-9	1.21443	3.09969
2'-Deoxyguanosine	Nucleotides and derivatives	Nucleotides and derivatives	961-07-9	1.25382	4.3162
2-Deoxyribose-5'-phosphate	Nucleotides and derivatives	Nucleotides and derivatives	102916-66-5	1.2234	2.0703
2'-Deoxyuridine	Nucleotides and derivatives	Nucleotides and derivatives	951-78-0	1.25824	5206
5-Methylcytosine	Nucleotides and derivatives	Nucleotides and derivatives	554-01-8	1.17263	3.24425
5-Methyluridine	Nucleotides and derivatives	Nucleotides and derivatives	1463-10-1	1.25841	795.4
Cordycepin (3'-Deoxyadenosine)	Nucleotides and derivatives	Nucleotides and derivatives	73-03-0	1.25182	2.59247
Guanine	Nucleotides and derivatives	Nucleotides and derivatives	73-40-5	1.21215	2.76242
Hypoxanthine	Nucleotides and derivatives	Nucleotides and derivatives	68-94-0	1.23711	2.07796
Isopentenyladenine-7-N-glucoside	Nucleotides and derivatives	Nucleotides and derivatives	-	1.25742	16.6827
Thymidine	Nucleotides and derivatives	Nucleotides and derivatives	50-89-5	1.25479	5.34068
Uridine 5'-monophosphate	Nucleotides and derivatives	Nucleotides and derivatives	58-97-9	1.25635	2290.41
(-)-Jasmonoyl-L-Isoleucine	Organic acids	Organic acids	120330-93-0	1.228	2.4695
1-Aminocyclopropane-1-carboxylic acid	Organic acids	Organic acids	22059-21-8	1.25855	3405.78
2-Isopropylmalic Acid	Organic acids	Organic acids	49601-06-1	1.19494	2.32599
2-Picolinic acid	Organic acids	Organic acids	98-98-6	1.17047	2.77169
2-Propylmalic Acid	Organic acids	Organic acids	-	1.22307	2.31786
3-Isopropylmalic Acid	Organic acids	Organic acids	921-28-8	1.19201	2.10035
3-Ureidopropionic Acid	Organic acids	Organic acids	462-88-4	1.21569	2.38369
Abscisic acid	Organic acids	Organic acids	21293-29-8	1.25389	5.59864
Argininosuccinic acid	Organic acids	Organic acids	2387-71-5	1.13803	3.00386
Azelaic acid	Organic acids	Organic acids	123-99-9	1.25645	3.62355
D-Erythronolactone	Organic acids	Organic acids	15667-21-7	1.25538	35.4891
Glutaric acid	Organic acids	Organic acids	110-94-1	1.22064	2.91021
Isonicotinic acid	Organic acids	Organic acids	55-22-1	1.14853	2.416
Muconic acid	Organic acids	Organic acids	1119-72-8	1.25672	18.6286
Pyruvic acid	Organic acids	Organic acids	127-17-3	1.19718	2.27243
Sebacate	Organic acids	Organic acids	111-20-6	1.22279	2.77044
Suberic Acid	Organic acids	Organic acids	505-48-6	1.25366	3.08841
D-Arabinose	Others	Saccharides and Alcohols	10323-20-3	1.21901	2.29507
Dihydroxyacetone phosphate	Others	Saccharides and Alcohols	57-04-5	1.25061	14.4796
Sorbitol-6-phosphate	Others	Saccharides and Alcohols	20479-58-7	1.24995	6.54043
Turanose	Others	Saccharides and Alcohols	547-25-1	1.25809	20.9417
Xylitol	Others	Saccharides and Alcohols	87-99-0	1.1782	3.31623
Nicotinic acid (Vitamin B3)	Others	Vitamin	59-67-6	1.1824	2.43665
1,2-O-Diferuloylglycerol	Phenolic acids	Phenolic acids	-	1.2528	47.2731
1,3-O-Diferuloylglycerol	Phenolic acids	Phenolic acids	83008-46-2	1.25349	46.416
1,3-O-Di-p-Coumaroylglycerol	Phenolic acids	Phenolic acids	-	1.25244	500.462
1-Feruloyl-sn-glycerol	Phenolic acids	Phenolic acids	-	1.25612	10.0893
1-O-Feruloyl-3-O-p-Coumaroylglycerol	Phenolic acids	Phenolic acids	-	1.25525	478.405
1-O-Vanilloyl-D-Glucose	Phenolic acids	Phenolic acids	-	1.25215	4.24616
2,5-Dihydroxybenzaldehyde	Phenolic acids	Phenolic acids	1194-98-5	1.25262	4.44739
2-Feruloyl-sn-glycerol	Phenolic acids	Phenolic acids	-	1.2504	8.89761
2-Phenylethanol	Phenolic acids	Phenolic acids	60-12-8	1.22819	2.26255
3-Hydroxycinnamic Acid	Phenolic acids	Phenolic acids	14755-02-3	1.05648	2.31649
4'-Hydroxy-3'-methoxyacetophenone (Acetovanillone)	Phenolic acids	Phenolic acids	498-02-2	1.18914	5.2554
4-Hydroxybenzoic acid	Phenolic acids	Phenolic acids	99-96-7	1.25414	5.05901
5-O-p-Coumaroylshikimic acid O-glucoside	Phenolic acids	Phenolic acids	-	1.23254	2.99119
6-O-Feruloyl-D-glucose	Phenolic acids	Phenolic acids	137887-25-3	1.24679	3.75071
Benzamide	Phenolic acids	Phenolic acids	55-21-0	1.23593	2.08656
Protocatechualdehyde	Phenolic acids	Phenolic acids	139-85-5	1.25229	4.62662
Sinapic acid	Phenolic acids	Phenolic acids	530-59-6	1.24381	3.41777
Syringaldehyde; 4-Hydroxy-3,5-Dimethoxybenzaldehyde	Phenolic acids	Phenolic acids	134-96-3	1.15421	2.19969
Syringic acid	Phenolic acids	Phenolic acids	530-57-4	1.24623	9.80443
Vanillic acid	Phenolic acids	Phenolic acids	121-34-6	1.25344	3.52394
Maslinic acid	Terpenoids	Triterpene	4373-41-5	1.25792	6033.93
Ergotamine	Alkaloids	Alkaloids	113-15-5	1.21818	0.238367
N-Methyltryptamine	Alkaloids	Alkaloids	61-49-4	1.23805	0.0716414
Trigonelline	Alkaloids	Alkaloids	535-83-1	1.23112	0.435054
Acetryptine	Alkaloids	Phenolamine	3551-18-6	1.253	0.102328
N-(4'-O-glycosyl)-feruloyl agmatine	Alkaloids	Phenolamine	-	1.24709	0.288612
N-Feruloylagmatine	Alkaloids	Phenolamine	-	1.25495	0.0765871
N-Feruloylhydroxyputrescine	Alkaloids	Phenolamine	-	1.19323	0.336092
N-Feruloyltryptamine	Alkaloids	Phenolamine	53905-13-8	1.09233	0.435261
p-Coumaroylagmatine	Alkaloids	Phenolamine	7295-86-5	1.25078	0.0712138
p-Coumaroylcadaverine	Alkaloids	Phenolamine	-	1.13044	0.243866
Sinapoylagmatine	Alkaloids	Phenolamine	-	1.24589	0.153501
Sinapoylputrescine	Alkaloids	Phenolamine	70185-57-8	1.19004	0.392285
3-(2-(Methylamino)ethyl)-1H-indol-5-ol	Alkaloids	Plumerane	1134-01-6	1.25269	0.0898486
Serotonin	Alkaloids	Plumerane	50-67-9	1.10977	0.490538
Tryptamine	Alkaloids	Plumerane	61-54-1	1.25511	0.0558237
L-Alanyl-L-leucine	Amino acids and derivatives	Amino acids and derivatives	3303-34-2	1.23359	0.440541
L-Aspartic Acid	Amino acids and derivatives	Amino acids and derivatives	56-84-8	1.24723	0.238478
L-Citrulline	Amino acids and derivatives	Amino acids and derivatives	372-75-8	1.22757	0.442417
L-Glutamic acid-O-glycoside	Amino acids and derivatives	Amino acids and derivatives	-	1.19371	0.159643
L-Homocitrulline	Amino acids and derivatives	Amino acids and derivatives	1190-49-4	1.19117	0.422436
L-threo-3-Methylaspartate	Amino acids and derivatives	Amino acids and derivatives	6061-13-8	1.25115	0.372471
N-Acetyl-L-tyrosine	Amino acids and derivatives	Amino acids and derivatives	537-55-3	1.25225	0.273887
5,2'-Dihydroxy-7,8-dimethoxyflavone glycosides	Flavonoids	Flavones	-	1.24453	0.0664632
Apigenin-5-O-glucoside	Flavonoids	Flavones	28757-27-9	1.23515	0.396957
Chrysoeriol-6-C-glucoside (Isoscoparin)	Flavonoids	Flavones	20013-23-4	1.19982	0.378589
Chrysoeriol-7-O-(6''-sinapoyl)glucoside	Flavonoids	Flavones	-	1.22257	0.272992
Eupatilin-7-O-glucoside	Flavonoids	Flavones	-	1.24582	0.411255
Isovitexin-2''-O-(6'''-feruloyl)glucoside	Flavonoids	Flavones	-	1.21168	0.382063
Isovitexin-2''-O-(6'''-p-coumaroyl)glucoside	Flavonoids	Flavones	-	1.2028	0.349921
Luteolin-7-O-(6''-sinapoyl)glucoside	Flavonoids	Flavones	-	1.1771	0.483619
Apigenin-6-C-glucoside (Isovitexin)	Flavonoids	Flavonoid carbonoside	29702-25-8	1.25091	0.424069
Isoorientin-7-O-(6''-p-coumaroyl)glucoside	Flavonoids	Flavonoid carbonoside	-	1.23201	0.271488
Isovitexin-7-O-glucoside-2''-O-rhamnoside	Flavonoids	Flavonoid carbonoside	-	1.24423	0.416625
Vitexin-7-O-(6''-feruloyl)glucoside	Flavonoids	Flavonoid carbonoside	-	1.25284	0.297063
Vitexin-7-O-(6''-p-coumaroyl)glucoside	Flavonoids	Flavonoid carbonoside	-	1.23327	0.340563
Genistein-7-O-Glucoside (Genistin)	Flavonoids	Isoflavones	529-59-9	1.16893	0.384381
Genistein-8-C-glucoside	Flavonoids	Isoflavones	66026-80-0	1.24794	0.479781
7-Methoxycoumarin	Lignans and Coumarins	Coumarins	531-59-9	1.24984	0.267051
Coumarin	Lignans and Coumarins	Coumarins	91-64-5	1.24499	0.410323
Coumarin O-rutinoside	Lignans and Coumarins	Coumarins	-	1.1497	0.474298
Scopoletin-7-O-glucoside (Scopolin)	Lignans and Coumarins	Coumarins	531-44-2	1.22195	0.243893
Olivil-4'-O-glucoside	Lignans and Coumarins	Lignans	76880-93-8	1.16546	0.496005
Pinoresinol-4-O-glucoside	Lignans and Coumarins	Lignans	41607-20-9	1.24048	0.489716
Syringaresinol-4'-O-(6''-acetyl)glucoside	Lignans and Coumarins	Lignans	-	1.21146	0.348598
5S,8R-DiHODE; (5S,8R,9Z,12Z)-5,8-Dihydroxyoctadeca-9,12-dienoate	Lipids	Free fatty acids	-	1.18836	0.410669
Myristoleic acid	Lipids	Free fatty acids	544-64-9	1.15508	0.34484
LysoPC 14:0	Lipids	LPC	20559-16-4	1.1683	0.488362
LysoPC 16:1	Lipids	LPC	76790-27-7	1.18035	0.334734
LysoPC 16:2	Lipids	LPC	-	1.22185	0.286388
LysoPC 16:2(2n isomer)	Lipids	LPC	-	1.14594	0.404886
LysoPC 18:1	Lipids	LPC	-	1.2073	0.350382
LysoPC 18:1(2n isomer)	Lipids	LPC	-	1.19686	0.344041
LysoPC 18:4	Lipids	LPC	-	1.20529	0.338393
LysoPC 19:0	Lipids	LPC	108273-88-7	1.19317	0.230717
LysoPC 19:2	Lipids	LPC	-	1.10728	0.323711
LysoPC 19:2(2n isomer)	Lipids	LPC	-	1.17161	0.317376
LysoPC 19:3	Lipids	LPC	-	1.16377	0.458185
LysoPC 20:1	Lipids	LPC	-	1.16437	0.430156
LysoPC 20:2	Lipids	LPC	-	1.21813	0.462403
LysoPC 20:2(2n isomer)	Lipids	LPC	-	1.20543	0.389509
LysoPC 20:3	Lipids	LPC	1199257-41-4	1.13037	0.482625
LysoPE 16:3	Lipids	LPE	-	1.23081	0.356701
LysoPE 18:1	Lipids	LPE	89576-29-4	1.10494	0.3646
LysoPE 18:2	Lipids	LPE	-	1.20372	0.352932
LysoPE 18:2(2n isomer)	Lipids	LPE	-	1.18239	0.445891
LysoPE 18:3	Lipids	LPE	-	1.19541	0.326688
LysoPE 18:3(2n isomer)	Lipids	LPE	-	1.21474	0.407903
LysoPE 18:4	Lipids	LPE	-	1.21645	0.358238
2'-Deoxyinosine-5'-monophosphate	Nucleotides and derivatives	Nucleotides and derivatives	3393-18-8	1.25664	0.00154698
9-(Arabinosyl)hypoxanthine	Nucleotides and derivatives	Nucleotides and derivatives	7013-16-3	1.18449	0.398882
Adenosine	Nucleotides and derivatives	Nucleotides and derivatives	58-61-7	1.21804	0.369396
Adenosine 5'-diphosphate	Nucleotides and derivatives	Nucleotides and derivatives	58-64-0	1.18783	0.345247
Uridine 5'-diphosphate	Nucleotides and derivatives	Nucleotides and derivatives	27821-45-0	1.24678	0.444164
3-Hydroxybenzoic Acid	Organic acids	Organic acids	99-06-9	1.23006	0.304992
Cis-Aconitic acid	Organic acids	Organic acids	585-84-2	1.21614	0.431471
Phenylpyruvic acid	Organic acids	Organic acids	156-06-9	1.24654	0.421963
Shikimic acid	Organic acids	Organic acids	138-59-0	1.17671	0.374708
D-Glucoronic acid	Others	Saccharides and Alcohols	6556-12-3	1.21237	0.489353
D-Threonic Acid	Others	Saccharides and Alcohols	3909-12-4	1.23651	0.0781588
1-O-[(E)-Caffeoyl]-D-glucose	Phenolic acids	Phenolic acids	-	1.24511	0.147565
1-O-Gentisoyl-D-glucoside	Phenolic acids	Phenolic acids	23445-11-6	1.25205	0.260179
1-O-Glucosyl sinapate	Phenolic acids	Phenolic acids	78185-48-5	1.23769	0.383641
1-O-p-Coumaroylquinic acid	Phenolic acids	Phenolic acids	-	1.24797	0.377743
1-O-Salicyl-D-glucose	Phenolic acids	Phenolic acids	60517-74-0	1.24984	0.353403
2,6-Dihydroxybenzoic acid	Phenolic acids	Phenolic acids	303-07-1	1.15267	0.49044
3,4-Dihydroxybenzeneacetic acid	Phenolic acids	Phenolic acids	102-32-9	1.17009	0.482796
3-O-Feruloylquinic acid	Phenolic acids	Phenolic acids	1899-29-2	1.25581	0.28251
3-O-p-Coumaroylshikimic acid	Phenolic acids	Phenolic acids	-	1.24092	0.109411
4-Hydroxy-3-methoxymandelate	Phenolic acids	Phenolic acids	55-10-7	1.24598	0.216664
5-O-Caffeoylshikimic acid	Phenolic acids	Phenolic acids	180981-12-8	1.25029	0.108708
5-O-Feruloylquinic acid	Phenolic acids	Phenolic acids	-	1.25159	0.350227
6-O-Caffeoyl-D-glucose	Phenolic acids	Phenolic acids	-	1.25576	0.202467
Caffeic acid	Phenolic acids	Phenolic acids	331-39-5	1.23438	0.30744
Chlorogenic acid methyl ester	Phenolic acids	Phenolic acids	29708-87-0	1.23136	0.185492
Cinnamic acid	Phenolic acids	Phenolic acids	140-10-3	1.21148	0.314202
Coniferin	Phenolic acids	Phenolic acids	531-29-3	1.24591	0.0937918
Di-O-Glucosylquinic acid	Phenolic acids	Phenolic acids	-	1.14807	0.341574
Disinapoyl glucoside	Phenolic acids	Phenolic acids	-	1.20445	0.490603
Feruloylmalic acid	Phenolic acids	Phenolic acids	-	1.25748	0.292972
Homogentisic acid	Phenolic acids	Phenolic acids	451-13-8	1.12206	0.49991
Isochlorogenic acid A	Phenolic acids	Phenolic acids	2450-53-5	1.10459	0.432839
Maleoyl-caffeoylquinic acid	Phenolic acids	Phenolic acids	-	1.24013	0.385517
Methyl sinapate	Phenolic acids	Phenolic acids	20733-94-2	1.23527	0.404677
Protocatechuic acid-4-O-glucoside	Phenolic acids	Phenolic acids	-	1.25013	0.228473
Trans-5-O-(p-Coumaroyl)shikimate	Phenolic acids	Phenolic acids	-	1.24989	0.114566
1-O-Galloyl-D-glucose	Tannins	Tannin	58511-73-2	1.25621	0.0577502
