# Supplementary material for: Salinity Tolerance in a Synthetic Allotetraploid Wheat (SlSlAA) Is Similar to Its Higher Tolerant Parent Aegilops longissima (SlSl) and Linked to Flavonoids Metabolism
Source: Front Plant Sci. 2022 Mar 17;13:835498. doi: 10.3389/fpls.2022.835498 (PMC8968947; doi:10.3389/fpls.2022.835498)
Supplement: Supplementary Table 10 — Two-Way ANOVA analysis of treatment vs. species for the level of each metabolite. For each metabolite, smaller P-value and greater F value generated indicate larger variation caused by species, stress treatment, or their interaction. [file Table_10.XLSX]

## Sheet: Leaf
Compounds	Class I	P value				F value
		genotype	treatment	genotype× treatment		genotype	treatment	genotype× treatment
Apigenin-6-C-(2''-glucuronyl)xyloside	Flavonoids	1.97264e-19	4.03506e-07	1.53461e-07		7858	97.8138	76.0008
Luteolin-6-C-rhamnoside-7-O-glucoside	Flavonoids	1.36008e-17	0.000134587	4.3437e-10		3877.5	30.3346	212.026
Chrysoeriol-6-C-glucoside-4'-O-glucoside	Flavonoids	2.4651e-17	9.20553e-05	2.1796e-05		3511.05	33.0289	29.8995
Isovitexin-7-O-glucoside(Saponarin)	Flavonoids	2.70908e-17	3.3725e-05	4.20477e-05		3456.16	41.0366	26.1757
Apigenin-6-C-xyloside-8-C-arabinoside	Flavonoids	5.42318e-17	2.63495e-13	2.74711e-12		3077.96	1158.19	500.997
Esculetin-7-O-quinic acid	Lignans and Coumarins	1.34323e-16	1.40652e-13	6.12286e-13		2645.31	1287.16	645.117
4-O-Sinapoylquinic acid	Phenolic acids	1.38982e-16	5.729e-07	4.20553e-07		2630.28	91.6358	63.3183
Isovitexin-8-O-xylcoside	Flavonoids	6.52607e-16	0.00575732	0.0544569		2031.24	11.2368	3.74561
HBOA-2-O-glucoside	Alkaloids	7.62922e-16	0.000169197	1.49759e-05		1978.9	28.7923	32.2166
Vitexin-2''-O-rhamnoside	Flavonoids	8.23307e-16	6.51867e-05	0.00341807		1953.86	35.6306	9.45923
Apigenin-6-C-(2''-glucosyl)arabinoside	Flavonoids	9.26703e-16	4.54431e-07	0.00086777		1915.59	95.6783	13.4275
Apigenin-6-C-arabinoside-8-C-xyloside	Flavonoids	1.15199e-15	8.19844e-12	2.123e-10		1847.15	648.206	239.655
Isoorientin-7-O-glucoside	Flavonoids	1.50618e-15	1.51169e-09	6.68196e-10		1766.17	265.242	196.924
Isovitexin-2''-O-rhamnoside	Flavonoids	2.23514e-15	0.00211725	0.00928517		1653.33	15.1954	7.08739
Swertiajaponin	Flavonoids	3.50302e-15	2.70292e-05	5.20977e-06		1533.61	42.9901	39.5703
Orientin-7-O-glucoside	Flavonoids	3.82805e-15	0.000343705	7.75467e-06		1511.01	24.3759	36.6472
Vanillyl-O-Vitexin	Flavonoids	4.05985e-15	1.97177e-06	8.50111e-08		1496.22	72.5209	84.484
3-O-Feruloylquinic acid	Phenolic acids	4.25993e-15	1.70161e-15	1.62265e-12		1484.22	2698.57	547.495
Scopoletin-7-O-glucuronide	Lignans and Coumarins	1.0925e-14	5.4847e-13	2.55465e-08		1267.74	1023.7	104.559
Hispidulin-8-C-(2''-O-glucosyl)glucoside	Flavonoids	1.18053e-14	6.53829e-05	1.10813e-06		1251.39	35.6073	52.982
1-O-p-Coumaroylquinic acid	Phenolic acids	1.43049e-14	4.85266e-08	0.000826722		1211.79	143.911	13.585
Isosaponarin(Isovitexin-4'-O-glucoside)	Flavonoids	1.52159e-14	9.21899e-09	1.85502e-06		1199.32	193.343	48.1286
Apigenin-6,8-di-C-arabinoside	Flavonoids	1.54233e-14	1.12523e-10	2.71147e-09		1196.6	414.981	154.676
3-O-p-Coumaroylquinic acid	Phenolic acids	1.55536e-14	0.914309	0.0236385		1194.92	0.0120769	5.19991
Apigenin-8-C-Arabinoside	Flavonoids	1.61e-14	1.13978e-07	5.27444e-07		1188.02	123.351	60.7506
Apigenin-8-C-(2''-glucosyl)arabinoside	Flavonoids	1.64007e-14	0.00284587	0.00527811		1184.35	13.953	8.37931
Chrysoeriol-6,8-di-C-glucoside	Flavonoids	2.63219e-14	0.00931472	0.0364913		1094.1	9.56507	4.41805
Diosmetin-8-C-(2''-O-rhamnosyl)glucoside	Flavonoids	6.34829e-14	0.0401876	0.00176005		943.967	5.29063	11.2675
Apigenin-5-O-glucoside	Flavonoids	7.06609e-14	2.27149e-10	5.73501e-08		927.157	367.905	90.6189
N-Methyltryptamine	Alkaloids	8.96724e-14	4.90028e-12	2.72783e-13		890.826	707.258	739.044
"Vitexin-2""-O-galactoside"	Flavonoids	9.34514e-14	0.142645	0.475479		884.677	2.46153	0.791452
Isoschaftoside	Flavonoids	1.18136e-13	0.000105823	0.0404449		850.552	32.0202	4.24096
Kaempferol-3-O-glucuronide	Flavonoids	1.22454e-13	3.8599e-07	4.65866e-05		845.443	98.622	25.6306
Kaempferol-3-O-neohesperidoside	Flavonoids	1.52754e-13	0.000429907	0.0039435		814.639	23.0875	9.09516
5-O-Feruloylquinic acid	Phenolic acids	1.58303e-13	6.98288e-10	8.83619e-10		809.774	303.207	187.69
Isovitexin-7-O-glucoside-2''-O-rhamnoside	Flavonoids	1.74472e-13	1.15469e-09	1.59831e-07		796.657	277.933	75.4469
Luteolin-6,8-di-C-glucoside	Flavonoids	2.05749e-13	3.52044e-06	1.53496e-07		774.899	64.8273	75.9977
Isoluteolin-6,8-di-C-glucoside	Flavonoids	2.29863e-13	1.59456e-05	6.78157e-06		760.608	47.9509	37.611
1-O-Sinapoyl-D-glucose	Phenolic acids	2.30417e-13	7.18774e-05	0.000308536		760.3	34.8787	17.0817
Tricin-7-O-(6''-O-malonyl)glucoside	Flavonoids	2.3453e-13	0.00225003	0.000338791		758.044	14.9347	16.7246
Tricin-4'-O-(syringyl alcohol)ether-7-O-glucoside	Flavonoids	2.61394e-13	0.000208114	0.000501605		744.358	27.4473	15.2858
Eupatilin-7-O-glucoside	Flavonoids	2.93334e-13	0.00680482	0.000136417		730.079	10.6399	20.4448
DIMBOA glucoside	Alkaloids	3.30683e-13	2.19243e-10	2.5293e-10		715.521	370.15	232.589
1,3-O-Diferuloylglycerol	Phenolic acids	3.56652e-13	5.56455e-13	3.8523e-13		706.487	1021.21	697.393
3,4,5-Trimethoxyphenyl-1-O-Glucoside	Phenolic acids	3.7639e-13	1.30978e-07	0.0107791		700.12	120.272	6.76597
Apigenin-6,8-di-C-glucoside-4'-O-glucoside	Flavonoids	4.47538e-13	0.00543033	0.0104868		680.035	11.4498	6.82461
Genistein-8-C-glucoside	Flavonoids	5.23417e-13	9.66129e-09	5.7944e-06		662.359	191.753	38.7696
Genistein-7-O-galactoside-rhamnose	Flavonoids	5.46828e-13	1.10672e-06	0.000498725		657.503	80.9635	15.3063
1-O-Feruloyl-D-Glucose	Phenolic acids	5.57578e-13	6.09112e-05	3.9252e-05		655.353	36.1599	26.5468
Orientin-2''-O-galactoside	Flavonoids	6.5432e-13	8.76259e-06	1.08818e-07		637.951	54.1349	80.8362

## Sheet: Root
Compounds	Class I	P value				F value
		genotype	treatment	genotype× treatment		genotype	treatment	genotype× treatment
4-Pyridoxic acid	Others	1.93882e-18	4.7756e-12	5.27067e-14		5367.14	710.35	973.882
N-Methyltryptamine	Alkaloids	1.49322e-15	1.24351e-12	1.84259e-13		1768.72	891.731	789.389
Scopoletin-7-O-glucuronide	Lignans and Coumarins	3.10388e-15	2.52414e-15	4.73518e-13		1564.97	2526.21	673.613
1-O-Feruloyl-D-Glucose	Phenolic acids	3.14573e-15	2.1802e-05	0.013387		1561.46	44.9576	6.31319
9-Oxononanoic acid	Organic acids	3.77748e-15	3.43506e-12	1.21404e-09		1514.38	751.078	177.701
3-O-Feruloylquinic acid	Phenolic acids	6.44304e-15	0.0276013	0.00810492		1384.92	6.28087	7.3873
Azelaic acid	Organic acids	1.54185e-14	3.75186e-11	1.11501e-09		1196.66	500.577	180.325
(-)-Jasmonoyl-L-Isoleucine	Organic acids	1.9723e-14	7.50813e-17	4.05169e-12		1148.31	4547.25	469.202
LysoPE 15:1	Lipids	3.94374e-14	1.99279e-14	9.27419e-12		1022.41	1787	407.941
p-Coumaroylcadaverine	Alkaloids	7.35591e-14	1.65864e-11	3.04471e-05		920.926	575.148	27.9542
Ayapin	Lignans and Coumarins	1.0327e-13	1.66394e-10	1.31444e-08		869.97	388.086	117.508
4-Pyridoxic acid-O-glucoside	Others	1.03435e-13	0.178769	0.283229		869.736	2.03946	1.40392
L-Tyramine	Amino acids and derivatives	1.76303e-13	5.41653e-08	9.21152e-08		795.262	141.097	83.2817
Uracil	Nucleotides and derivatives	2.21554e-13	1.43641e-12	9.26854e-11		765.326	870.29	276.043
2-Hydroxyhexadecanoic acid	Organic acids	3.57201e-13	9.16419e-13	0.000144137		706.305	938.848	20.2033
Uridine 5'-diphospho-D-glucose	Nucleotides and derivatives	4.92562e-13	6.75966e-10	2.15283e-06		669.162	304.913	46.8019
Isonicotinic acid	Organic acids	5.52402e-13	1.85474e-07	3.28076e-07		656.382	112.873	66.2474
LysoPC 15:1	Lipids	7.91835e-13	5.88003e-09	1.41939e-06		617.8	209.256	50.598
N-Acetyl-L-tyrosine	Amino acids and derivatives	8.82923e-13	3.47828e-08	1.3683e-05		606.582	152.756	32.7961
Phenylpyruvic acid	Organic acids	8.93546e-13	0.0224181	0.000393557		605.362	6.86019	16.1641
2'-Deoxyguanosine	Nucleotides and derivatives	9.29196e-13	5.71731e-15	1.34657e-11		601.389	2202.98	382.997
2-Picolinic acid	Organic acids	1.21675e-12	0.000139386	0.0386406		574.699	30.0946	4.31915
N-Feruloylputrescine	Alkaloids	1.3756e-12	0.0625274	5.56709e-11		562.944	4.21526	301.053
Sinapoyl malate	Phenolic acids	1.75527e-12	0.0278333	0.16418		540.295	6.25803	2.10833
L-Phenylalanine	Amino acids and derivatives	1.80493e-12	1.04781e-07	5.82941e-07		537.761	125.249	59.6468
Feruloylmalic acid	Phenolic acids	1.81354e-12	4.24672e-08	9.57491e-09		537.33	147.395	124.205
2'-Deoxyuridine	Nucleotides and derivatives	1.99362e-12	9.4316e-14	2.42998e-11		528.824	1376.58	346.547
Isorhamnetin-3-O-Glucoside	Flavonoids	2.4687e-12	3.35864e-11	2.4687e-12		510.107	510.107	510.107
N-Feruloyl-Cadaverine	Alkaloids	2.51817e-12	3.12828e-12	1.80206e-09		508.403	763.055	165.998
3-Hydroxybutyric acid	Organic acids	2.90032e-12	7.96592e-15	3.26477e-12		496.432	2083.91	486.617
3,4,5-Trimethoxyphenyl-1-O-Glucoside	Phenolic acids	3.03572e-12	0.000207223	0.000285123		492.625	27.4747	17.3873
Apigenin-7-O-(6''-malonyl)glucoside	Flavonoids	3.29446e-12	4.46907e-11	3.29446e-12		485.874	485.874	485.874
"Vitexin-2""-O-galactoside"	Flavonoids	3.31167e-12	2.01904e-09	1.57355e-10		485.447	252.229	252.229
Sinapoylagmatine	Alkaloids	3.51614e-12	1.83948e-11	1.86226e-09		480.564	565.123	165.058
Medioresinol-4'-O-(6'''-acetyl)glucoside	Lignans and Coumarins	4.26282e-12	4.3819e-05	8.32576e-05		465.196	38.8171	22.7131
6-Methylmercaptopurine	Nucleotides and derivatives	4.34208e-12	1.10276e-06	7.22373e-06		463.752	81.0185	37.1543
N-Feruloylhydroxyputrescine	Alkaloids	5.18785e-12	0.0704084	0.262286		450.023	3.94265	1.49932
N-Benzylmethylene isomethylamine	Alkaloids	5.23936e-12	3.28769e-07	1.96586e-06		449.273	101.595	47.6075
4-O-Sinapoylquinic acid	Phenolic acids	5.53808e-12	8.25129e-06	0.000446169		445.085	54.7909	15.7054
Nicotinic acid (Vitamin B3)	Others	5.54143e-12	1.79944e-06	2.79778e-06		445.039	73.8042	44.5455
5-Acetamidopentanoic Acid	Organic acids	5.72217e-12	4.47606e-09	3.06403e-07		442.633	219.507	67.075
L-Glutamic acid-O-glycoside	Amino acids and derivatives	5.845e-12	3.05839e-06	6.59068e-05		441.048	66.6269	23.8536
Apigenin-6,8-di-C-glucoside-4'-O-glucoside	Flavonoids	6.25937e-12	2.06777e-08	1.70504e-09		435.973	167.592	167.592
N-Acetylputrescine	Alkaloids	6.54621e-12	2.75407e-05	2.67499e-06		432.685	42.8218	44.925
Succinic acid	Organic acids	7.51388e-12	3.43127e-12	2.0363e-10		422.72	751.218	241.368
5S,8R-DiHODE; (5S,8R,9Z,12Z)-5,8-Dihydroxyoctadeca-9,12-dienoate	Lipids	7.97467e-12	8.92757e-09	0.000785935		418.488	194.441	13.7509
Methylmalonic acid	Organic acids	9.02873e-12	4.02511e-12	2.43806e-10		409.796	731.204	234.055
γ-Aminobutyric acid	Organic acids	9.20149e-12	6.33796e-11	8.04525e-10		408.484	457.76	190.741
3-O-p-Coumaroylshikimic acid	Phenolic acids	1.07591e-11	5.25314e-08	0.000126337		397.821	141.876	20.7853
N-p-Coumaroylhydroxyputrescine	Alkaloids	1.08359e-11	8.57495e-06	0.000915131		397.342	54.3703	13.2562
